# Unraveling the intricate microtubule inner protein networks that reinforce mammalian sperm flagella

Miguel Ricardo Leung<sup>1</sup>, Marc C. Roelofs<sup>1</sup>, Riccardo Zenezini Chiozzi<sup>2</sup>, Johannes F. Hevler<sup>2</sup>, Albert J. R. Heck<sup>2</sup>, and Tzviya Zeev-Ben-Mordehai<sup>1,\*</sup>

<sup>1</sup>Structural Biochemistry Group, Bijvoet Centre for Biomolecular Research, Utrecht University, 3584 CG Utrecht, The Netherlands

<sup>2</sup>Biomolecular Mass Spectrometry & Proteomics, Bijvoet Centre for Biomolecular Research and Utrecht Institute for Pharmaceutical Sciences, Utrecht University, 3584 CH Utrecht, The Netherlands

\*correspondence to: z.zeev@uu.nl

## Abstract

To find and fuse with the egg, mammalian sperm must complete an arduous voyage through the female reproductive tract. The sperm cell's remarkable odyssey is powered by its flagellum, a microtubule-based molecular machine ornamented with accessory structures that stabilize the sperm tail in viscous media. Recently, cryo-electron tomography (cryo-ET) revealed that mammalian sperm flagella are further reinforced at the molecular scale with sperm-specific microtubule inner proteins (sperm-MIPs), but the identities of these sperm-MIPs are unknown. Here, we use cryo-electron microscopy to resolve structures of native bovine sperm doublet microtubules, thus identifying most sperm-MIPs. In the A-tubule, several copies of testis-specific Tektin-5 contribute to an extended protein network spanning nearly the entire microtubule lumen. Different copies of Tektin-5 adopt a range of conformations and organizations based on their local interactions with other MIPs. The B-tubule is in turn stabilized by sperm-MIPs that bind longitudinally along and laterally across protofilaments. We further resolve structures of endpiece singlet microtubules, revealing MIPs shared between singlets and doublets. Our structures shed light on the molecular diversity of cilia across different cell types of the vertebrate body and provide a structural framework for understanding the molecular underpinnings of male infertility.

sperm | motile cilia | microtubule inner proteins | cryo-electron microscopy

## Main

To find and fuse with the egg, mammalian sperm must complete an arduous voyage through the female reproductive tract; along the way, they encounter viscous media, shear flows, and physical barriers<sup>1</sup>. The sperm cell's journey is powered by its flagellum, a microtubule-based molecular machine called a motile cilium. Motile cilia are microtubule-based assemblies used by a wide range of organisms and cell types to swim through fluid or to move fluid across their surfaces<sup>2,3</sup>. The core of the motile cilium is the axoneme, a veritable molecular behemoth comprised of hundreds of different proteins, including dynein motors that drive motion and an extensive array of regulatory proteins that fine-tune motility<sup>4</sup>. These proteins are anchored on axonemal microtubules, which consist of nine doublet microtubules (DMTs) arranged around a central pair of microtubules. High-resolution cryo-electron microscopy (cryo-EM) reconstructions of algal and mammalian DMTs

revealed a panoply of microtubule inner proteins (MIPs) that stabilize the structure during ciliary beating<sup>5-10</sup>. However, recent studies have begun to shed light on species- and cell type-specific differences in axoneme structure, particularly in the MIP repertoire<sup>11-14</sup>.

Mammalian sperm flagella are longer (~60 μm for bull sperm, ~120 μm for mouse sperm; versus ~7 μm for respiratory cilia, ~10 μm for *Chlamydomonas* flagella) and stiffer than other ciliated cell types<sup>15,16</sup>. This rigidity is due to the presence of large accessory structures like outer dense fibers and the fibrous sheath, which suppress buckling of the axoneme under loading in high-viscosity fluids like those in the female reproductive tract<sup>15-18</sup>. Cryo-ET revealed that mammalian sperm axonemal DMTs and endpiece singlet microtubules (SMTs) are further reinforced at the nano-scale with extensive MIP densities<sup>12,19-21</sup>, many of which remain unaccounted for in high-resolution structures of DMTs from *Chlamydomonas* flagella and mammalian respiratory cilia<sup>5,6</sup>. It can be hypothesized that the additional MIPs in mammalian sperm (henceforth "sperm-MIPs") serve to reinforce and thus stabilize the microtubule lattice itself against the large mechanical stresses involved in bending mammalian sperm flagella. However, because the identities of many sperm-MIPs are unknown, the structural mechanisms for such stabilization are unclear.

In this study, we use cryo-electron microscopy to resolve elaborate MIP networks in native mammalian sperm axonemal DMTs and endpiece SMTs. These reconstructions allow us to identify most sperm-MIPs and to describe their molecular organization, revealing how they reinforce the microtubule lattice. We further identify sperm-MIPs shared between axonemal DMTs and endpiece SMTs. Our structures can contribute towards identifying novel targets for contraception and will enhance our understanding of the molecular bases of male infertility.

**Cryo-EM reveals elaborate sperm-specific ornamentation of axonemal doublets.** Mammalian sperm flagella present a challenge for purification and fractionation because axonemal microtubules are intimately associated with large accessory structures like the mitochondrial sheath, the outer dense fibers, and the fibrous sheath<sup>17</sup>. Thus, rather than purifying sperm DMTs, we splayed the axonemes using a sliding disintegration protocol developed by Lindemann et al.<sup>22</sup>. After the mitochondrial sheath is removed by DTT treatment and a freeze-thaw cycle, ATP-induced sliding causes the dou-

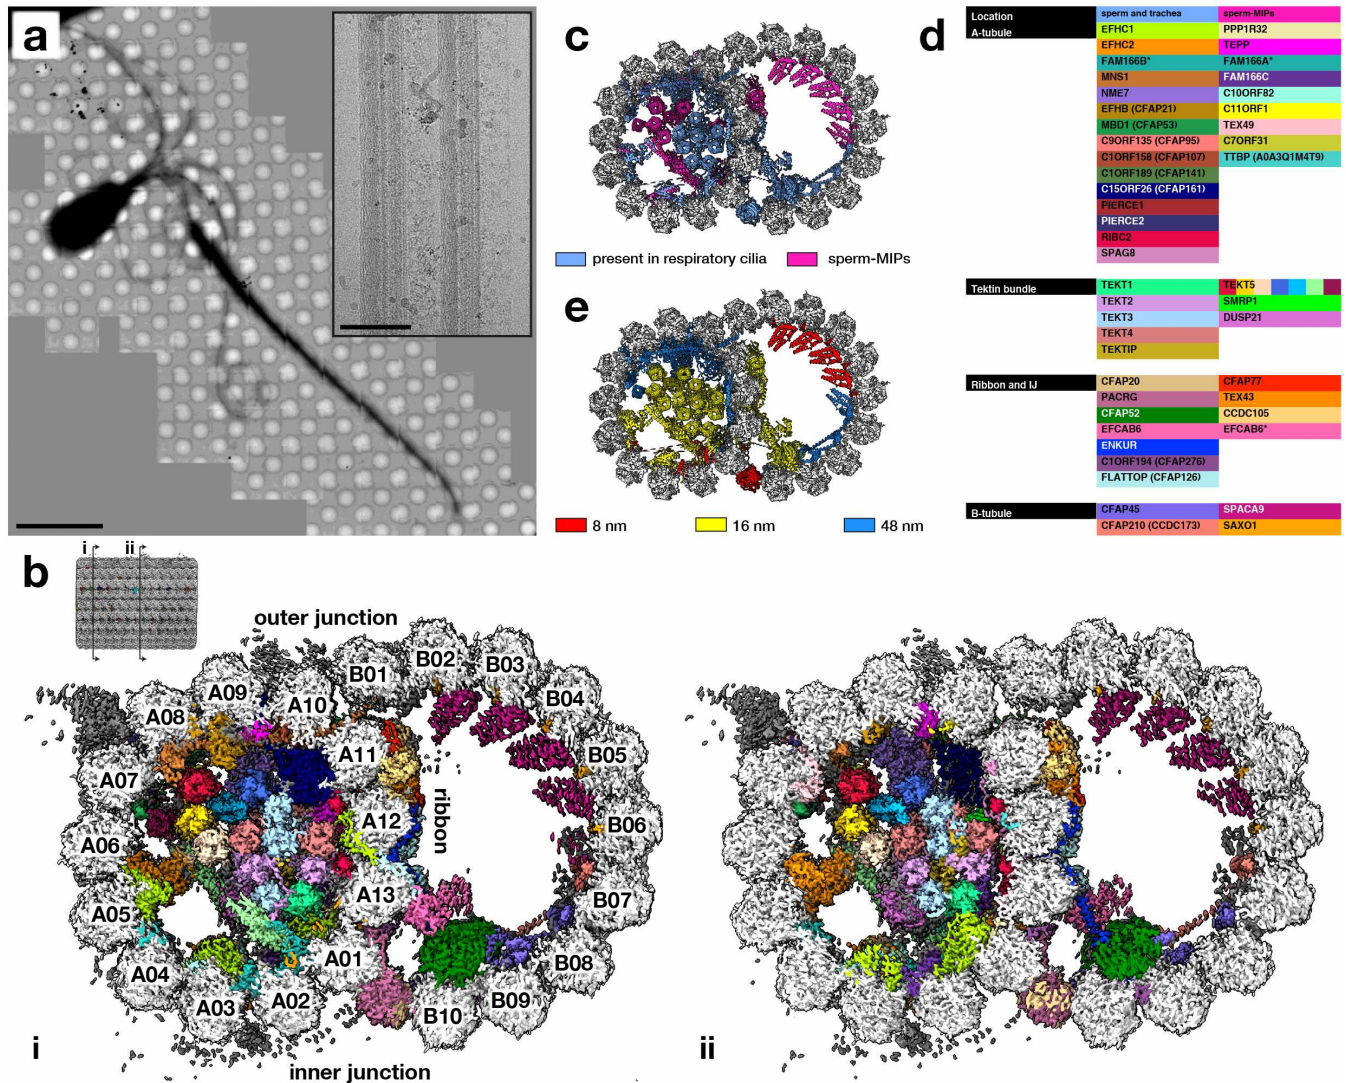

**Fig. 1. Cryo-electron microscopy unveils elaborate sperm-specific ornamentation of axonemal doublet microtubules (DMTs).** (a) Cryo-EM image of a bovine sperm cell after sliding disintegration of the axoneme. Note how the DMTs are extruded from the midpiece. Scale bar: 10  $\mu$ m. Inset: high-magnification cryo-EM image of sperm DMTs attached to their respective outer dense fibers. Scale bar: 100 nm. (b) Cryo-EM map of bovine sperm DMTs with 45 microtubule inner proteins (MIPs) colored individually; note that different groups of Tektin-5 are also colored individually (see Figs. 2 and 3). Panels (i) and (ii) are cross-sections taken at the locations indicated in the inset. (c) Atomic model of the 48-nm repeat of sperm DMTs with MIPs present in respiratory cilia colored in blue and sperm-MIPs colored in pink. (d) List of MIPs common to sperm and trachea (blue column) and MIPs newly-identified in sperm (pink column) arranged according to their locations in the DMT. (e) Atomic model of sperm DMTs with MIPs colored according to periodicity.

91 blets to buckle out of the midpiece while still attached to their 104  
 92 respective ODFs, disintegrating the axoneme and exposing 105  
 93 individual DMTs suitable for cryo-EM (Fig. 1a). 106

94 We reconstructed the 48-nm DMT repeat to an overall 107  
 95 resolution of  $\sim 3.7$   $\text{\AA}$ , with local resolutions reaching  $\sim 3$   $\text{\AA}$  in 108  
 96 the A-tubule lumen (Fig. 1b, Fig. S1). Fitting our maps into 109  
 97 *in situ* subtomogram averages of mammalian sperm DMTs 110  
 98 showed that our structures retain all prominent MIP densities 111  
 99 (Fig. S2a), confirming that the sliding disintegration protocol 112  
 100 preserves MIP architecture. We also resolve basal structures 113  
 101 of external axonemal complexes like the radial spokes and 114  
 102 the nexin/dynein regulatory complex (Fig. S2b). 115

103 Based on well-resolved side chain density, we used 116

the findMySequence program<sup>23</sup>, supplemented with DALI 117  
 searches and AlphaFold predictions, to confidently assign 118  
 most MIP identities (Fig. S3, Fig. S4), although a number of 119  
 shorter or more poorly-resolved densities remain unassigned. 120  
 Overall, our cryo-EM maps allowed us to build an atomic 121  
 model consisting of >40 different MIPs (Fig. 1b,d, Movie 122  
 S1). Mammalian sperm DMTs retain nearly all MIPs present 123  
 in respiratory cilia, one notable exception being FAM166B, 124  
 which is expressed at low levels in the testis<sup>24</sup> and is replaced 125  
 by FAM166A in sperm. Reconstructing the two halves of 126  
 the 96-nm repeat confirmed the overall 48-nm periodicity of 127  
 MIPs in sperm DMTs (Fig. S2c). Individual sperm-MIPs 128  
 have varying periodicities, but follow the general principles 129

117 observed for bovine tracheal and *Chlamydomonas* DMTs, i.e. 174  
118 MIPs close to the A-tubule seam have 48-nm repeats and 175  
119 those in the A-tubule lumen have 16-nm repeats (Fig. 1e). 176  
120 At least 17 of the identified MIPs appear to be sperm- 177  
121 specific as they were not identified in previous cryo-EM maps 178  
122 of bovine respiratory cilia <sup>6</sup> (Fig. 1c-d). We henceforth refer 179  
123 to the MIPs unique to sperm as “sperm-MIPs”. Sperm-MIPs 180  
124 form three major groups: MIPs found in the A-tubule (Fig. 181  
125 2, 3), MIPs at the ribbon (protofilaments A11-A13) and inner 182  
126 junction (Fig. 7), and MIPs in the B-tubule (Fig. 8), in 183  
127 addition to individual sperm-MIPs scattered across the DMT. 184  
128 This extensive ornamentation of the DMT may explain why 185  
129 we measure a more compact tubulin lattice in sperm DMTs 186  
130 versus tracheal DMTs (Fig. S5). 187

131 **The sperm A-tubule has an extended tektin network**  
132 **formed by multiple copies of the testis-specific**  
133 **Tektin-5, which adopt a variety of conformations and**  
134 **organizations.** Mammalian sperm have multiple unique  
135 alpha-helical MIPs in the A-tubule, which form an additional  
136 supercomplex (termed the “sickle” by Afzelius <sup>25</sup>) attached  
137 to the 8-tektin bundle (the “pentagon”) (Fig. 1c). As  
138 a result, nearly the entire lumen of the A-tubule is filled  
139 with MIPs (Fig. 1b, 2a), explaining its dense appearance  
140 in electron micrographs. Well-resolved side chain density  
141 allows findMySequence <sup>23</sup> to confidently assign the alpha-  
142 helical MIPs as multiple copies of the testis-specific Tektin-  
143 5 (TEKT5). These copies form seven groups (TEKT5-  
144 A to TEKT5-G) based on their location and organization.  
145 Three groups of Tektin-5 (TEKT5-A: red, TEKT5-B: yellow,  
146 TEKT5-C: beige) form filaments through the canonical end-  
147 to-end association seen in other tektins <sup>6</sup> (i.e. the L2 loop  
148 of one molecule inserts into the L12 loop of the adjacent  
149 molecule) (Fig. 2b, 4). 207

150 The other four groups of Tektin-5 (TEKT5-D to 208  
151 TEKT5-G) adopt novel conformations and organizations. 209  
152 For example, TEKT5-D (dark blue) near NME-7 forms 210  
153 an interrupted filament; in every 48-nm repeat, one 211  
154 copy associates with its neighbor via the canonical 212  
155 interface (“straight” tektin), but two copies adopt a “bent” 213  
156 conformation, where their 2A/2B helices curve downwards 214  
157 to accommodate NME-7 (Fig. 2c, 4). These bent helices 215  
158 are then positioned to interact with TEKT4-2 in the pentagon 216  
159 (Fig. 2c). One “bent” Tektin-5 molecule and one “straight” 217  
160 Tektin-5 molecule each interact directly with one copy of 218  
161 NME-7, their L12 loops inserting into the NME-7 putative  
162 nucleotide-binding pocket (Fig. 2d). Two additional “bent” 219  
163 Tektin-5 molecules (TEKT5-E: light blue) found near the two 220  
164 copies of NME-7 bridge TEKT5-A, TEKT5-B, TEKT5-D, 221  
165 and TEKT4-2 (Fig. 2a,c). 222

166 Four copies of Tektin-5, TEKT5-F, are unique in that they 223  
167 do not run parallel to the other tektin filaments. Instead, 224  
168 they run diagonally perpendicular to the long axis of the 225  
169 DMT, with one copy every 16-nm forming the handle of 226  
170 the “sickle” (Fig. 2a-b, 4). Their N-termini interact with 227  
171 FAM166A between protofilaments A01-A02 (Fig. 2e), 228  
172 and their C-termini interact with a groove formed by an 229  
173 interaction between the N-terminus of TEKT5-C and EFHC2 230

(Fig. 2f,g). The C-terminal tail of TEKT2-2 also loops  
around TEKT3-1 to interact with TEKT5-F (Fig. 2h). In  
addition, three densities bind to TEKT2-2 and TEKT3-1 near  
TEKT5-F (Fig. 2b). By building a partial poly-alanine  
model and querying the DALI server, we could assign one  
of these densities as a dual-specificity phosphatase domain,  
which findMySequence subsequently identified as DUSP21  
(Fig. 2b, S3c). The two densities flanking DUSP-21  
remain unassigned. Finally, in every 48-nm repeat there is  
one additional copy of Tektin-5, TEKT5-G, found between  
TEKT5-B and CFAP53 close to protofilament A06 (Fig.  
2a, 4). TEKT5-G density is weaker than adjacent Tektin-5  
molecules, suggesting that it may only be weakly bound to  
its neighbours or that it is only present in a subset of DMTs.

Comparing the models of the Tektin-5 filaments derived  
from our cryo-EM map reveals unexpected diversity in tektin  
conformation (Fig. 3). As described above, individual  
molecules within the TEKT5-A, TEKT5-B, and TEKT5-C  
filaments interact through the canonical mechanism seen in  
Tektin-1 to -4. As such, Tektin-5 monomers within these  
filaments adopt the conformations described previously.  
However, the monomers within the TEKT5-D, TEKT5-E,  
TEKT5-F, and TEKT5-G groups do not directly interact  
with one another, so they adopt different conformations.  
For instance, the L12 loop – which normally wraps around  
the L2 loop of the neighboring molecule – is disordered  
in TEKT5-E, TEKT5-F, and TEKT5-G (Fig. 3, green  
arrowheads). It is ordered in the TEKT5-D group because  
it is stabilized by interactions with NME-7 (Fig. 2c and  
Fig. 3, green arrowheads). Likewise, the L2 loops  
are disordered in most of these groups (Fig. 3, orange  
arrowheads), except for the “straight” protomer in TEKT5-  
D, where the L2 loop is ordered because it is stabilized by  
interactions with a neighboring Tektin-5 (Fig. 2c). Likewise,  
the Tektin-5 molecules that do not interact directly with  
other tektins lack density before the region of Trp155 (Fig.  
3, blue arrows). This corresponds to ~60 fewer residues  
resolved when compared to the Tektin-5 molecules that  
form filaments, where the N-terminal region is stabilized by  
packing against the adjacent molecule. One exception is in  
TEKT5-F, which binds diagonally across the A-tubule, where  
we resolve ~30 more residues before Trp 155 (Fig. 3, dark  
blue arrowhead). In TEKT5-F, this region of the 1A helix  
has refolded into a helix and a loop, forming a hairpin which  
interacts with FAM166A (Fig. 2e).

**Sperm-MIPs interact with the tektin bundle, forming  
a continuous protein interaction network that bridges  
the A-tubule lumen.** In addition to the Tektin-5 bundle,  
multiple individual sperm-MIPs are scattered throughout the  
A-tubule (Fig. 1b-d, 5, 6). For example, C11ORF1 and  
TEPP (testis-, prostate-, and placenta-expressed) are novel  
seam-binding MIPs bridging protofilaments A09 and A10  
(Fig. 5a). TEX49 binds at protofilaments A07/A08 close  
to Pierce1/2; although structurally-unrelated to the Pierce  
proteins, TEX49 also extends out of the DMT and appears  
to interact with coiled-coil proteins that form the base of the  
outer dynein arm docking complex (Fig. 5b).

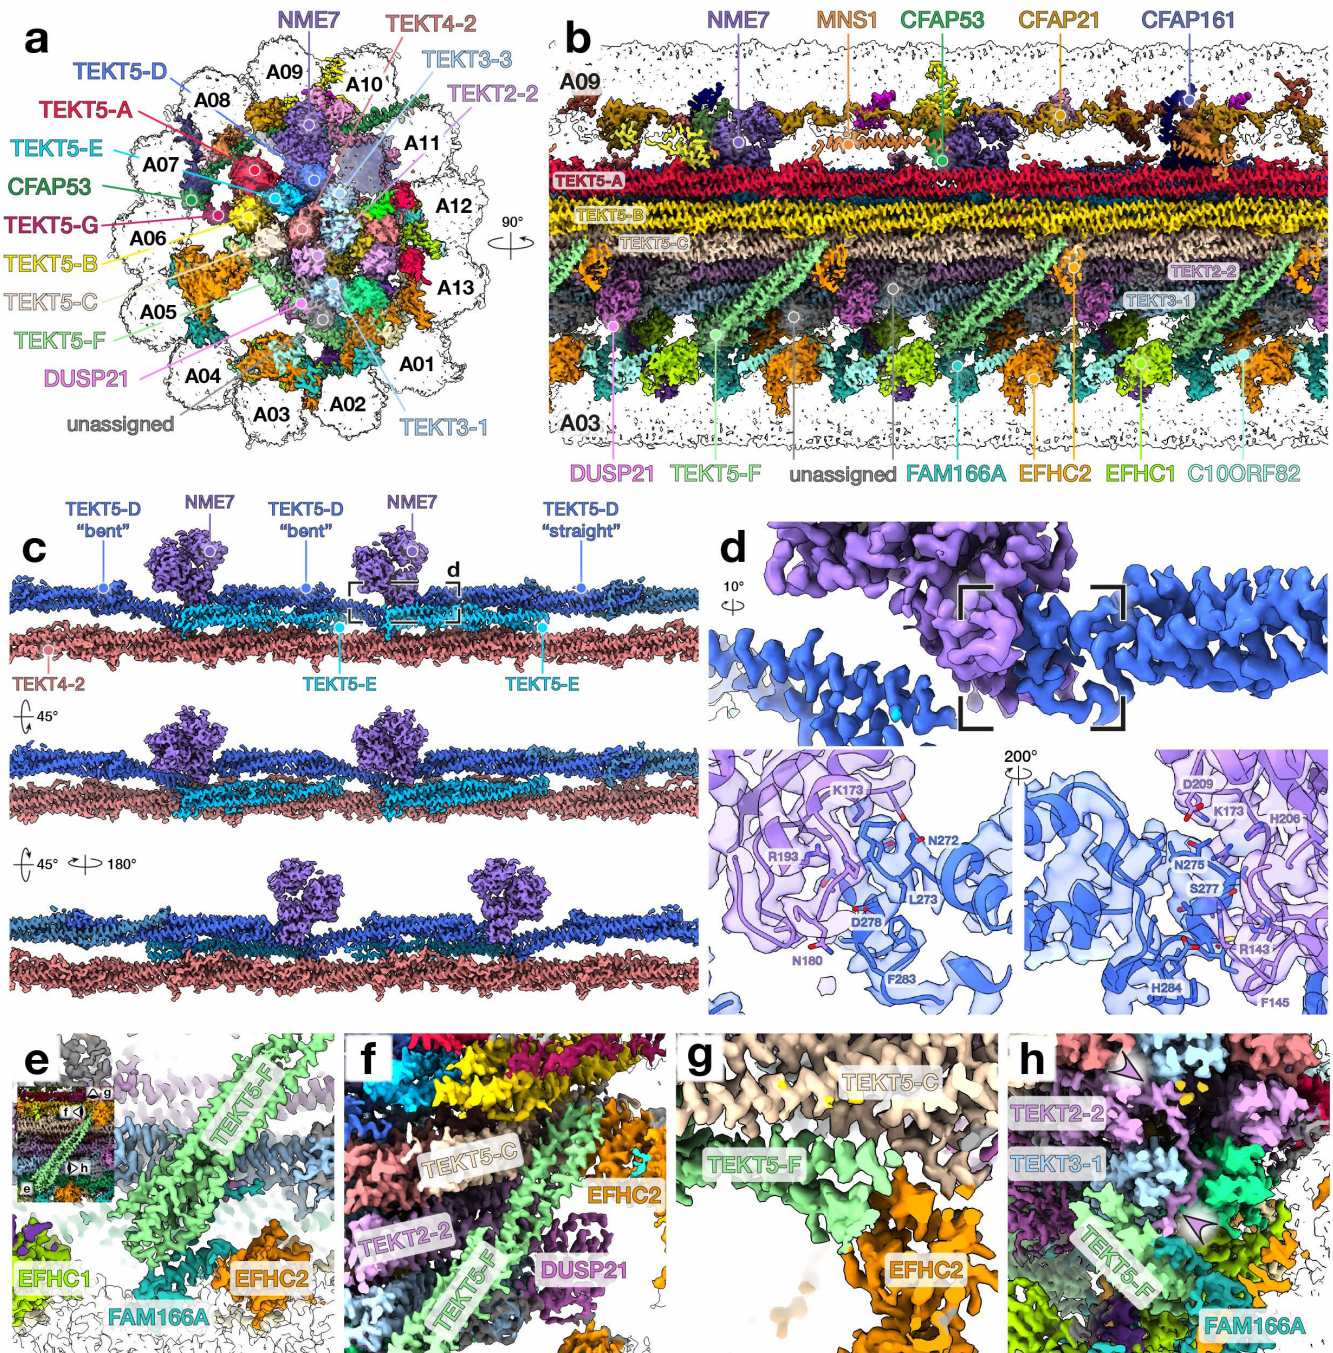

**Fig. 2. Multiple copies of the testis-specific Tektin-5 form an extended bundle in the A-tubule.** (a-b) Cryo-EM map of the A-tubule of sperm DMTs with individual MIPs colored. (c) Interactions between NME7 and the TEKT5-D and TEKT5-E filaments. Note how the monomers in the TEKT5-D filament adopt different conformations depending on whether their 2A/2B helices interact with NME7 ("bent" TEKT5) or a neighboring tektin ("straight" TEKT5). (d) The L12 loop of the "straight" TEKT5-D monomer inserts into the putative nucleotide-binding pocket of NME7. The L12 of one "bent" TEKT5-D monomer interacts with the second copy of NME-7 in a similar fashion. Note that the top panel in (d) is rotated 10° relative to the view in (c). (e-h) Interactions between TEKT5-F and neighboring MIPs of the A-tubule. Viewing directions are indicated in the inset in panel (e).

231 Around protofilaments A01/A02, FAM166C docks onto 237  
 232 TEKT1-1 with a 16-nm repeat (Fig. 6a-b). A helix close 238  
 233 to the FAM166C N-terminus packs against the 1B and 2A 239  
 234 helices of TEKT1-1 (Fig. 6c), while the FAM166C C- 240  
 235 terminus extends downwards to interact with EFHC1 (Fig. 241  
 236 6a). Also interacting with TEKT1-1 is PPP1R32 (protein 242

phosphatase 1 regulatory subunit 32), which interacts with  
 the TEKT1-1 L1/2 loop at the inter-protomer interface once  
 every 48 nm (Fig. 6d). PPP1R32 bridges TEKT1-1 and the  
 tubulin lattice, interacting with both the inter- and intra-dimer  
 $\alpha/\beta$ -tubulin interfaces (Fig. 6e). Notably, PPP1R32 was  
 identified as a conserved ciliary protein in an evolutionary

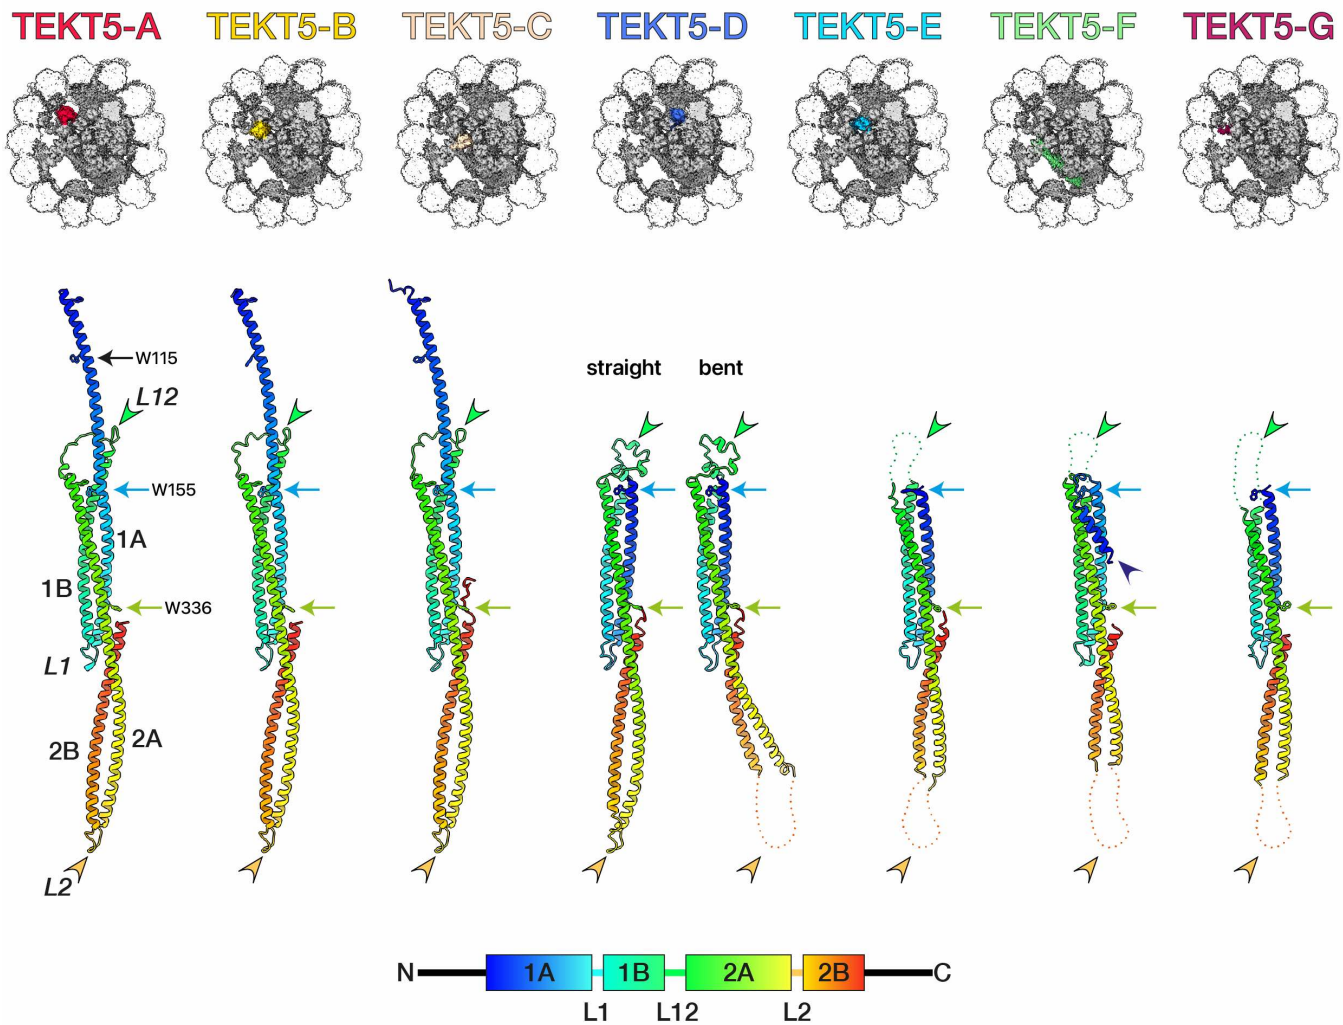

**Fig. 3. Multiple copies of Tektin-5 adopt different conformations based on their local interactions.** For reference, the locations of Trp residues are indicated with black (Trp115, N-terminal region), blue (Trp155, 1A helix), and green (Trp336, 2A helix) arrows. A schematic of the tektin domain arrangement and corresponding color-code is provided at the bottom of the figure. The Tektin-5 filaments TEKT5-A, TEKT5-B, and TEKT5-C all adopt the canonical tektin conformation. Note how the N-terminal region is not resolved in the other groups, except in TEKT5-F where part of it refolds (dark blue arrowhead). In the group TEKT5-D, the L2 loop is disordered in the “bent” tektins, because these do not interact with other tektins; only the L2 loop of the “straight” tektin is resolved (compare orange arrowheads) because it is stabilized by interaction with a neighboring tektin (see also Fig. 2c). The L12 loops are ordered by interaction with the nucleotide-binding pocket of NME7 (compare green arrowheads, see also Fig. 2d).

243 proteomics study, where it was also confirmed to localize to 258  
 244 the ciliary base when heterologously expressed in cultured 259  
 245 cells <sup>26</sup>. 260

246 Beside protofilament A12, the sperm-MIP SMRP1 261  
 247 (spermatid-specific manchette-related protein 1) interacts 262  
 248 with TEKT4-1 and with the N-terminus of TEKTIIP (Fig. 263  
 249 6f). SMRP1 repeats every 16-nm, but every 48-nm there is 264  
 250 one copy of TEPP that rests on top of TEKT4-1 close to the 265  
 251 SMRP1 binding site (Fig. 6g). Another MIP with 48-nm 266  
 252 periodicity binds in this region - the uncharacterized protein 267  
 253 UniProt A0A3Q1M4T9, which bridges TEKT4-1 and tubulin 268  
 254 in protofilament A12 (Fig. 6g). We therefore rename this 269  
 255 protein the “tubulin- and tektin-bridging protein” or TTBP. 270  
 256 We note that proteomics identified both TTBP and PPP1R32 271  
 257 in bovine respiratory cilia <sup>6</sup>; however, the proteins were 272

not identified in the corresponding cryo-EM maps, possibly  
 because they have a more limited expression pattern around  
 or along the axoneme in tracheal cilia as opposed to sperm.

On the opposite side of the A-tubule, the sperm-MIP  
 C7ORF31 binds to tubulin in protofilament A08, as well  
 as to MNS1 and TEKT5-A (Fig. 6h-i). C7ORF31  
 may also function in the centriole, as it was identified  
 in a proteomics study of sperm centrioles and shown to  
 localize to centrosomes when expressed in cultured cells  
<sup>27</sup>. Altogether, with C7ORF31 interacting with TEKT5-  
 A, PPP1R32 interacting with TEKT1-1, EFHC2 interacting  
 with TEKT5-C and TEKT5-F, and NME-7 interacting  
 with TEKT5-D, the sperm-MIPs in the A-tubule form an  
 interconnected protein network bridging nearly the entire  
 microtubule lumen.

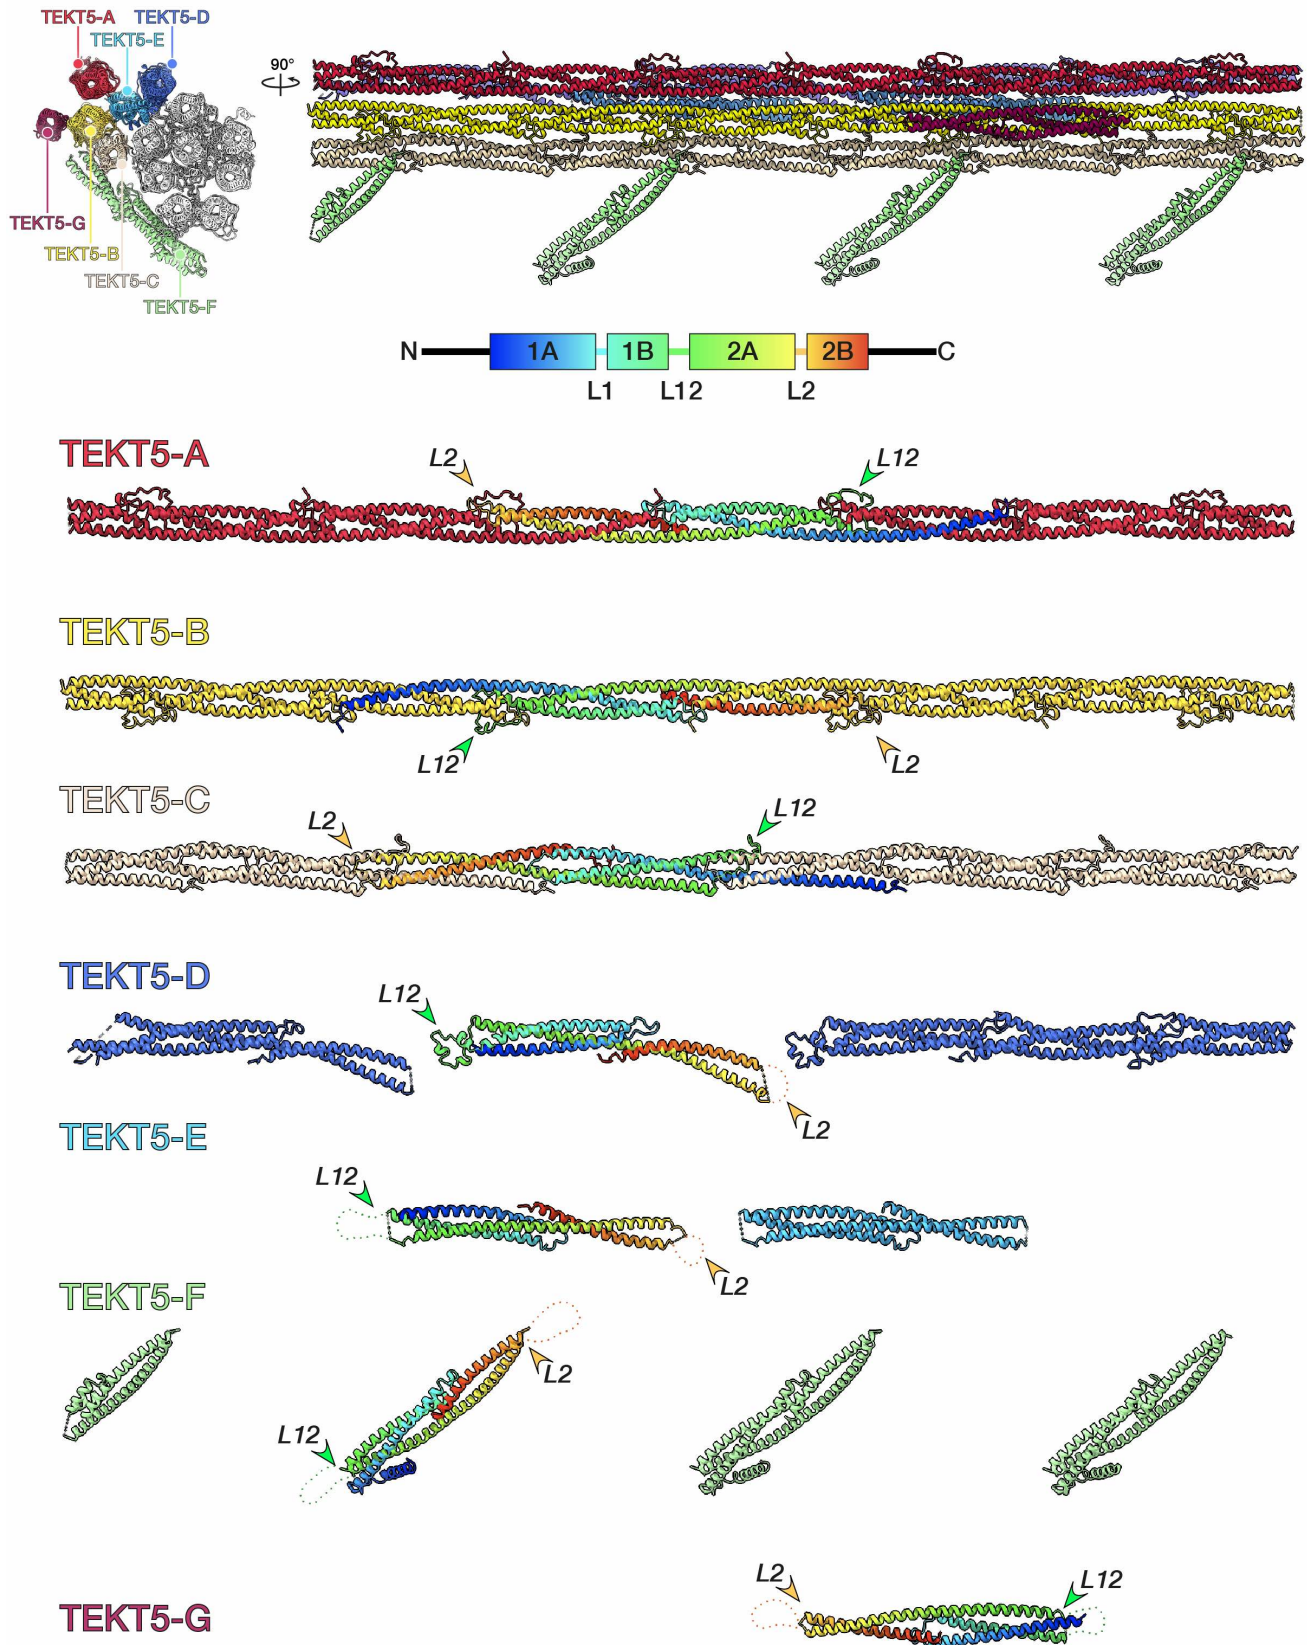

**Fig. 4. Comparing the quaternary structures of Tektin-5 in the bovine sperm DMT.** Tektins are grouped according to similar positions in the DMT, with groups labelled from “A” to “G”. For each group, one monomer is colored in a rainbow palette from N- (blue) to C-terminus (red).

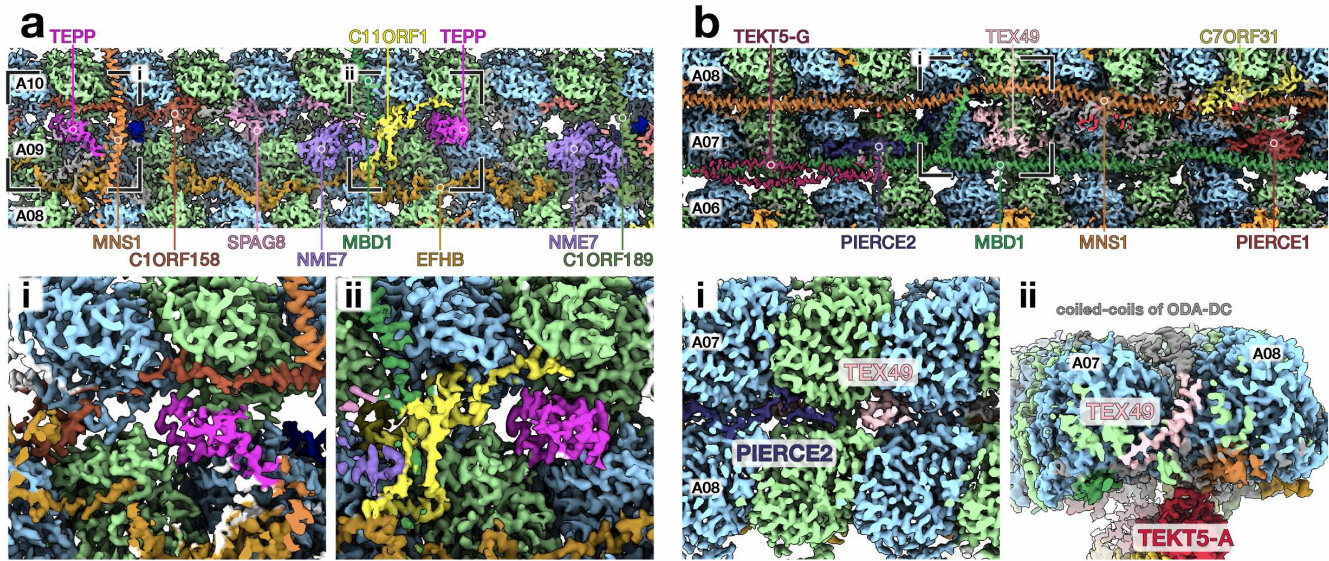

**Fig. 5. Sperm-MIPs in the A-tubule and their interactions with the tubulin lattice.** (a) MIPs bound to protofilaments A09/A10, the location of the A-tubule seam. The sperm-MIPs C11ORF1 (yellow) and TEPP (testis-, prostate-, and placenta-expressed, bright pink) are novel seam-binding MIPs. (b) MIPs bound to protofilaments A07/A08, whose external inter-prot filament ridge serves as the binding site for the outer dynein arm docking complex (ODA-DC). The sperm-MIP TEX49 (testis-expressed 49) extends through the microtubule wall and appears to interact with the coiled-coils at the base of the ODA-DC.

273 **Sperm-MIPs at the ribbon and inner junction interact** 306  
 274 **with tubulin C-terminal tails.** The inner junction (IJ), 307  
 275 where A01 and B10 are connected by alternating copies 308  
 276 of FAP20 and PACRG, is highly conserved between algae 309  
 277 and mammals <sup>5,6,8</sup>. The only major addition identified in 310  
 278 bovine respiratory cilia was one copy of EFCAB6 bound 311  
 279 to CFAP52 every 48-nm <sup>6</sup>. However, in sperm, the IJ 312  
 280 and its neighboring protofilaments A11-A13 – known as 313  
 281 the ribbon – are supplemented with additional MIPs (Fig. 314  
 282 1c, Fig. 7). In sperm, there are two additional copies 315  
 283 of EFCAB6, which thus has a 16-nm repeat as opposed 316  
 284 to the 48-nm repeat in respiratory cilia (Fig. 7a). There 317  
 285 is also a prominent filament of alpha-helical MIPs bound 318  
 286 to the inter-prot filament ridges between A11 and A12, 319  
 287 which we identify as the protein CCDC105. Two additional  
 288 sperm-MIPs bridge the IJ with CCDC105: CFAP77 binds 320  
 289 between FLATTOP and CCDC105; TEX43 binds close to 321  
 290 ENKUR and wraps around the inter-protomer interface of 322  
 291 CCDC105. We resolve additional density for the C-terminal 323  
 292 tails (CTTs) of the tubulin molecules to which these sperm- 324  
 293 MIPs are bound (Fig. 3b, arrowheads). The CTT of  $\alpha$ - 325  
 294 tubulin packs against TEX43, while the CTT of  $\beta$ -tubulin 326  
 295 from the neighboring dimer is sandwiched between CFAP77 327  
 296 and ENKUR. 328

297 The tertiary structure of CCDC105 is similar to that of 329  
 298 the tektins (Fig. 7c). However, instead of having four 330  
 299 helices, CCDC105 has five – what would be the equivalent 331  
 300 of the tektin 1A helix is instead split into two helices (which 332  
 301 we call 1A' and 1A'') separated by a loop (L1'), with the 333  
 302 N-terminal 1A' helix being shorter (Fig. 7c, upper left 334  
 303 panel). Furthermore, the mechanism by which protomers 335  
 304 assemble into filaments differs slightly between tektins and 336  
 305 CCDC105 (Fig. 7c, right). Like the tektins, the main 337

points of contact between neighboring CCDC105 molecules 306  
 are helical overhangs that extend beyond the central bundle. 307  
 However, CCDC105's equivalent of the L12 loop does not 308  
 clamp around the L2 loop of the neighboring molecule, 309  
 instead looping around the 1A'' helix of the same protomer 310  
 (Fig. 7c, arrowheads). Interactions between neighboring 311  
 CCDC105 molecules may be further stabilized by the sperm- 312  
 MIP TEX43, which acts like a staple, looping around the 313  
 inter-CCDC105 interface and interacting with protofilaments 314  
 A11 and A12 (Fig. 7a-c). Functionally, little is known about 315  
 CCDC105 other than that it is highly-expressed in testis <sup>24,28</sup> 316  
 and that it is down-regulated in a mouse QRICH2-knockout 317  
 model exhibiting multiple morphological abnormalities of the 318  
 flagella <sup>29</sup>. 319

**Sperm-MIPs in the B-tubule longitudinally and laterally** 329  
**reinforce the microtubule lattice.** Another major addition 330  
 to sperm DMTs are prominent MIPs bound to protofilaments 331  
 B02-B07 of the B-tubule (Fig. 8a), which lack large MIPs 332  
 in DMTs from either bovine trachea or *Chlamydomonas*. 333  
 These B-tubule MIPs correspond to the ladder-like densities 334  
 resolved in *in situ* subtomogram averages of pig (Fig. 9a) 335  
 and horse sperm DMTs (Fig. 9b). One B-tubule MIP (orange) 336  
 presents as a filamentous density binding at the intradimer 337  
 interface with an apparent ~8-nm periodicity. The binding 338  
 site, repeat distance, and morphometry of this density closely 339  
 resemble known MIPs FAP363 from *Chlamydomonas* <sup>5</sup> and 340  
 SPM1 from *Toxoplasma gondii* <sup>30</sup>, which are members of the 341  
 MAP6-related family of microtubule-stabilizing proteins 342  
 (Fig. 10) <sup>31,32</sup>. Specifically, the density is consistent with 343  
 the conserved Mn motif present in this family – a short helix 344  
 flanked by a conserved tyrosine/phenylalanine on one end 345  
 and a threonine/serine on the other (Fig. 10a) <sup>30,31</sup>. 346

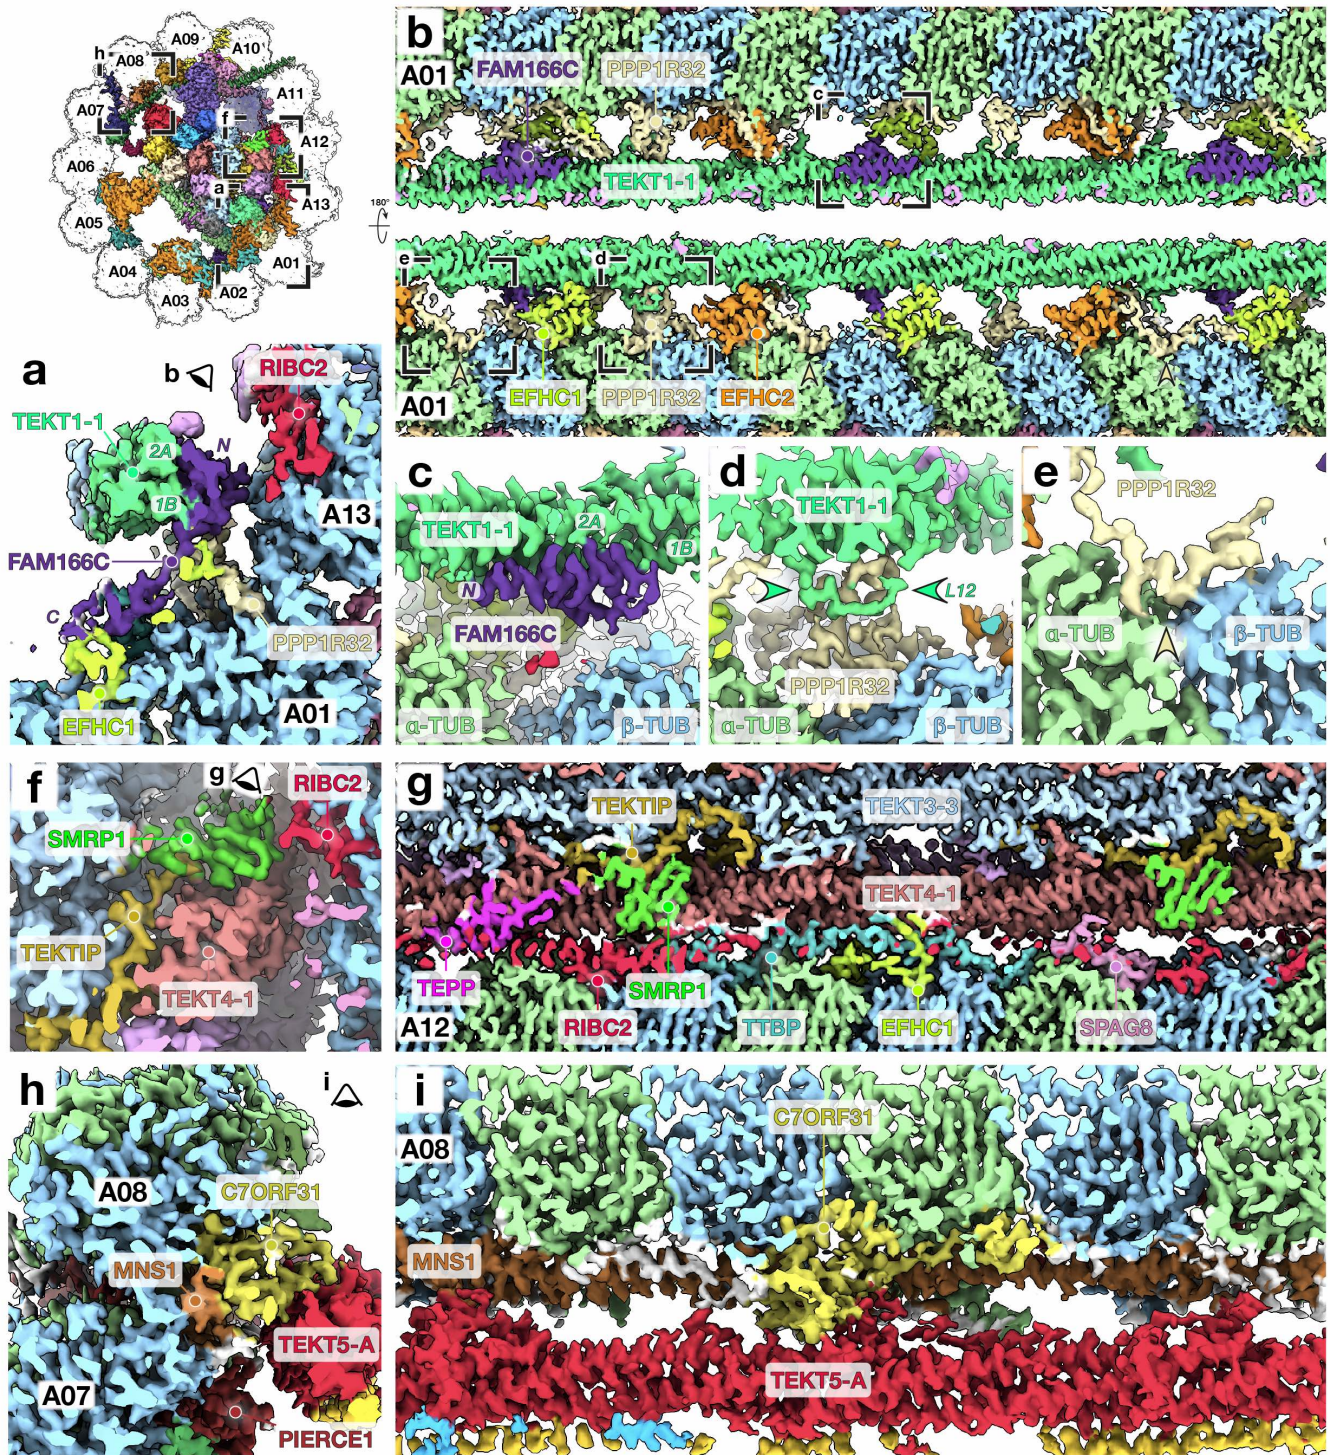

**Fig. 6. Sperm-MIPs in the A-tubule bridge the tektin bundle and the tubulin lattice, forming an interconnected protein network that spans nearly the entire microtubule lumen.** (a) At protofilament A01, Tektin1-1 (sea green) interacts with two sperm-MIPs: FAM166C (family with sequence similarity 166 member C, purple) and PPP1R32 (protein phosphatase 1 regulatory subunit 32, pale yellow). FAM166C bridges Tektin1-1 and EFHC1 on protofilament A02, while PPP1R32 bridges Tektin1-1 and the tubulin lattice at protofilament A01. (b) FAM166C repeats once every 16-nm while PPP1R32 repeats once every 48-nm. (c-e) Close-up views of interactions between Tektin1-1 helices 1B/2A and FAM166C (c); between the Tektin1-1 L12 loop and PPP1R32 (d); and between the intra-dimer  $\alpha$ - $\beta$ -tubulin interface and PPP1R32 (e). (f) Beside protofilament A12, the sperm-MIP SMRP1 (spermatid-specific manchette-related protein 1) packs against Tektin4-1 and interacts with the N-terminus of TEKTIP. (g) SMRP1 has a 16-nm repeat. Other sperm-MIPs in this region, TEPP and TTBP (tektin- and tubulin-bridging protein, UniProt A0A3Q1M4T9) have 48-nm repeats. TTBP bridges Tektin4-1 and the tubulin lattice at protofilament A12. (h-i) The sperm-MIP C7ORF31 bridges Tektin5-A and the tubulin lattice at protofilament A08.



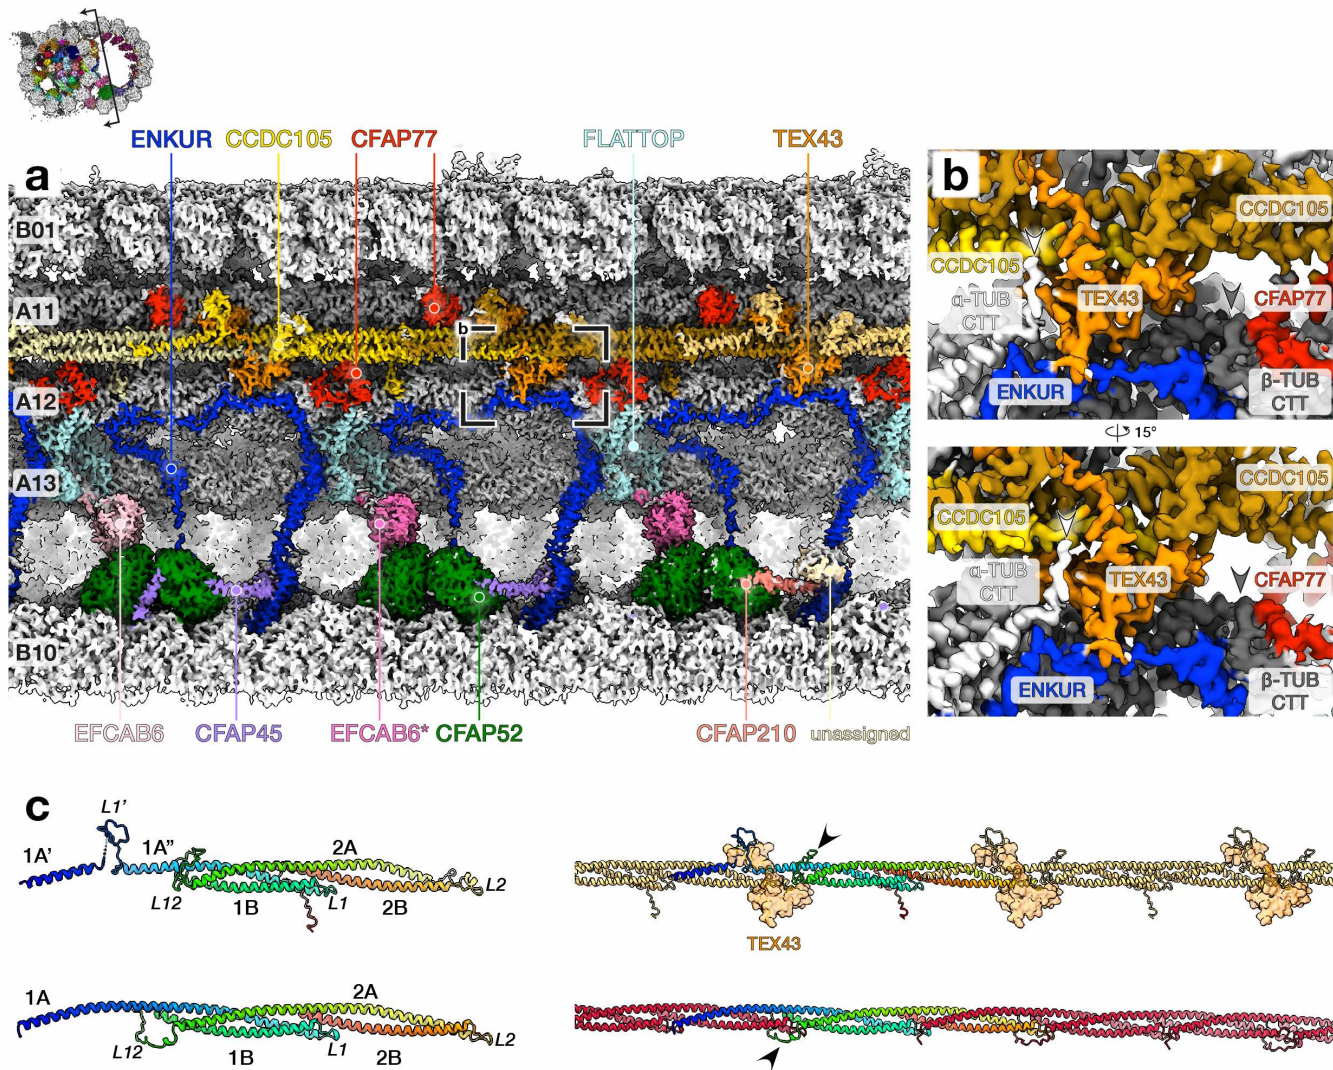

**Fig. 7. Sperm-MIPs at the ribbon interact with tubulin C-terminal tails.** (a) Cryo-EM map of the ribbon and inner junction of sperm DMTs with MIPs colored individually. Each protomer in the CCDC105 filament is colored separately for clarity. (b) Additional densities attributable to the C-terminal tails (CTTs) of tubulin are clearly visible on protofilament A12, near sperm-MIPs TEX43, CFAP77, and CCDC105. TEX43 and CFAP77 appear to interact with the CTTs of alpha- and beta-tubulin respectively (white and grey arrowheads). (c) Comparing the tertiary (left) and quaternary (right) structures of CCDC105 (upper) and tektin filaments (lower, tektin 5-A as an example). In the left panels, proteins are colored in a rainbow palette from N- (blue) to C-terminus (red). CCDC105 secondary structure is annotated by analogy to tektin. In the right panel, one copy of each protein is colored in a rainbow palette from N to C. The arrowheads indicate differences in the inter-protomer interface. For the CCDC105 filament, TEX43 molecules that bind at the inter-protomer interfaces are shown as transparent surfaces.

338 The mammalian homologs of FAP363 and SPM1 are 350  
 339 the stabilizer of axonemal microtubules proteins, SAXO1 351  
 340 and SAXO2<sup>32</sup>. Our proteomics data show that SAXO1 352  
 341 is abundant in bovine sperm while no unique peptides for 353  
 342 SAXO2 were detected (Table S2). Furthermore, our in- 354  
 343 cell cross-linking mass spectrometry (XL-MS) data show 355  
 344 cross-links between a lysine close to an Mn motif of 356  
 345 SAXO1 (Lys221) and Lys370 in the S9-S10 loop of α- 357  
 346 tubulin, which is near the SAXO1 binding site (Fig. 10b- 358  
 347 c, Table S3). We also confirmed that SAXO1 is present 359  
 348 in the bovine sperm flagellum using immunofluorescence 360  
 349 (Fig. 10d), which is consistent with its known presence 361

in human sperm flagella based on immunofluorescence and immunogold labelling<sup>32</sup>. Together, these lines of evidence suggest that the filamentous MIP in the B-tubule is SAXO1. Unsharpened maps suggest that SAXO1 binds longitudinally along individual protofilaments (Fig. 8c, arrowheads), similar to SPM1. However, we note that SAXO1 has 12 Mn repeats, which means that it could have a 96-nm periodicity when fully extended. The register of SAXO1 Mn motifs could not be determined from the density alone, nor could the small N- or C-terminal domains be resolved. More detailed analysis of the SAXO1 binding mode – and the binding modes of different Mn motif proteins – is an important target

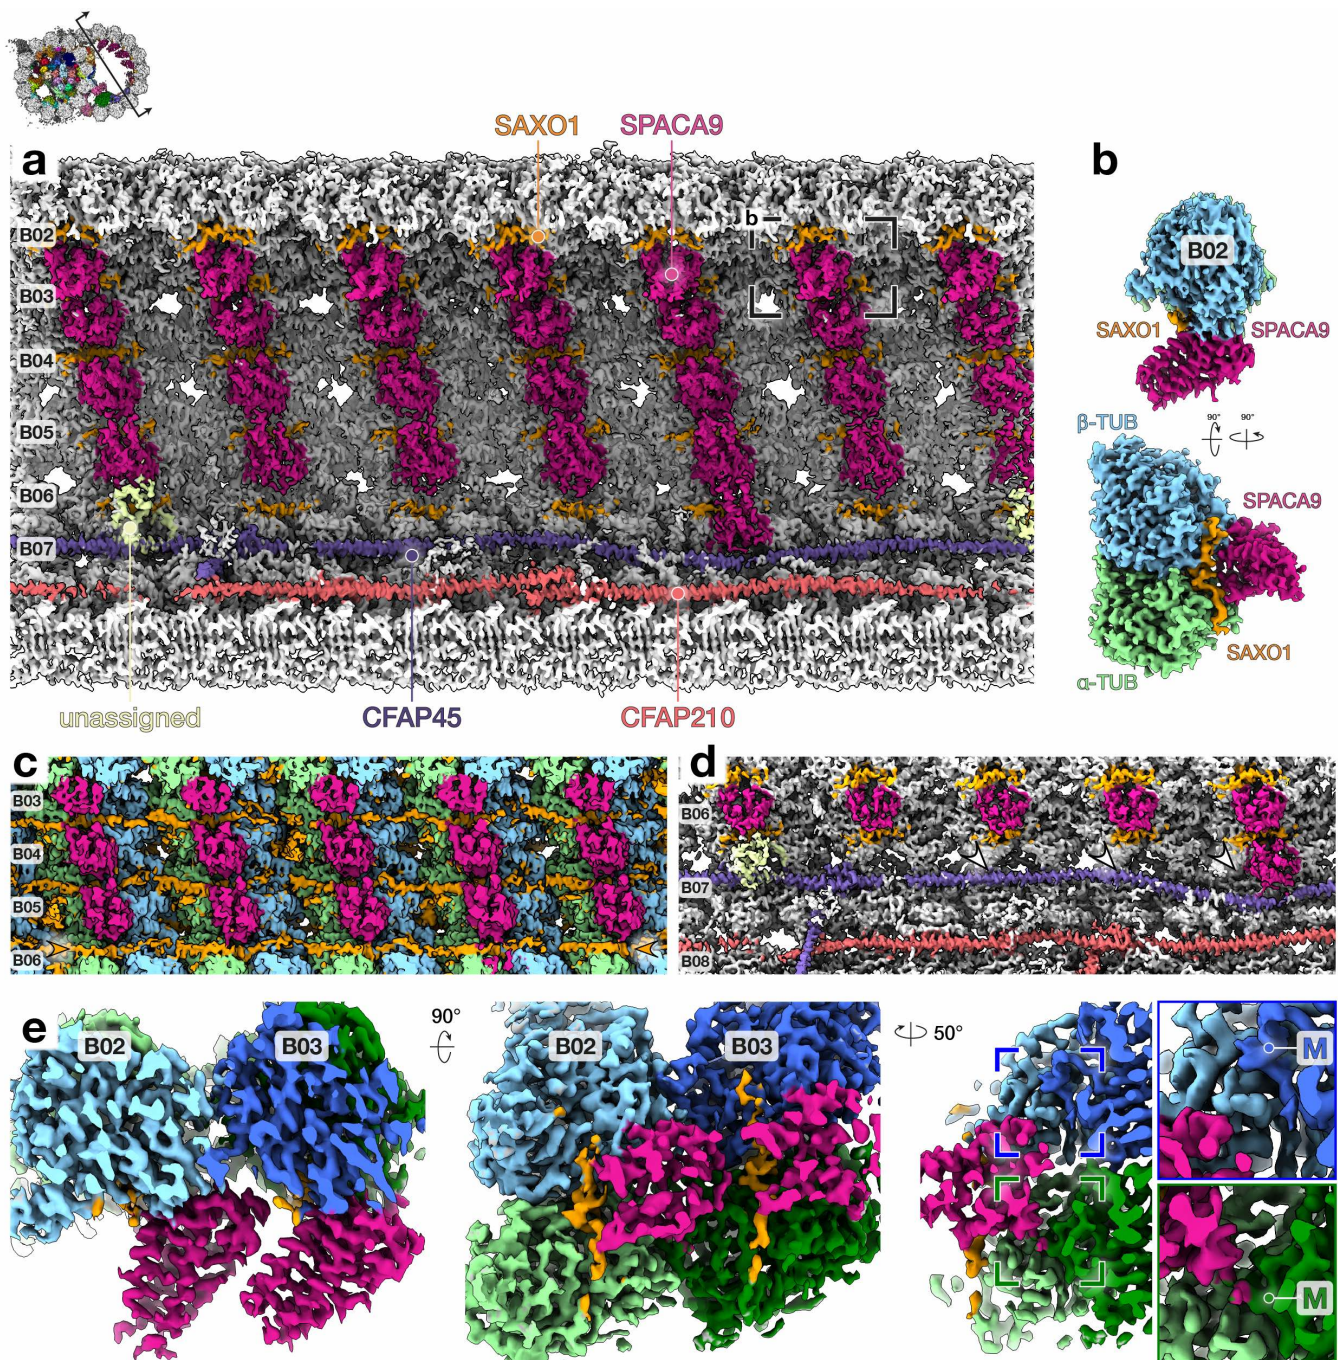

**Fig. 8. The B-tubule is decorated with MIPs that interact longitudinally and laterally across protofilaments.** (a) Cryo-EM map of the B-tubule of sperm DMTs, with individual MIPs colored. (b) Extracted density for one tubulin dimer and associated MIPs from protofilament B02, specifically from the region indicated in (a). (c) Unsharpened cryo-EM map of protofilaments B03-B06 illustrating how SAXO1 appears to bind longitudinally along individual protofilaments. (d) Every 48 nm, an additional copy of SPACA9 is present at the B06/B07 interface, where CFAP45 bends away and exposes a binding site (compare arrowheads). The unassigned MIP binds even when CFAP45 does not bend away, suggesting it may recognize CFAP45 instead of the B06/B07 interface. (e) Extracted density for neighboring tubulin dimers and associated SAXO1 and SPACA9 molecules taken from protofilaments B02/B03. SPACA9 interacts with both  $\alpha$ - and  $\beta$ -tubulin, along with the M-loop (labelled "M") of  $\alpha$ -tubulin from the neighboring protofilament (green box) but not the M-loop of the neighboring  $\beta$ -tubulin (blue box).

362 for future work.

363 The second MIP (magenta) – consists of a bundle of  
 364 alpha helices that binds across the intradimer  $\alpha/\beta$ -tubulin  
 365 interface as well as between adjacent protofilaments (Fig.

366 **8b,e**). Based on side chain densities, we identify this MIP as  
 367 sperm acrossome-associated 9 (SPACA9). Further supporting  
 368 this identification, the high-confidence AlphaFold structure  
 369 of SPACA9 is a bundle of alpha-helices whose topology

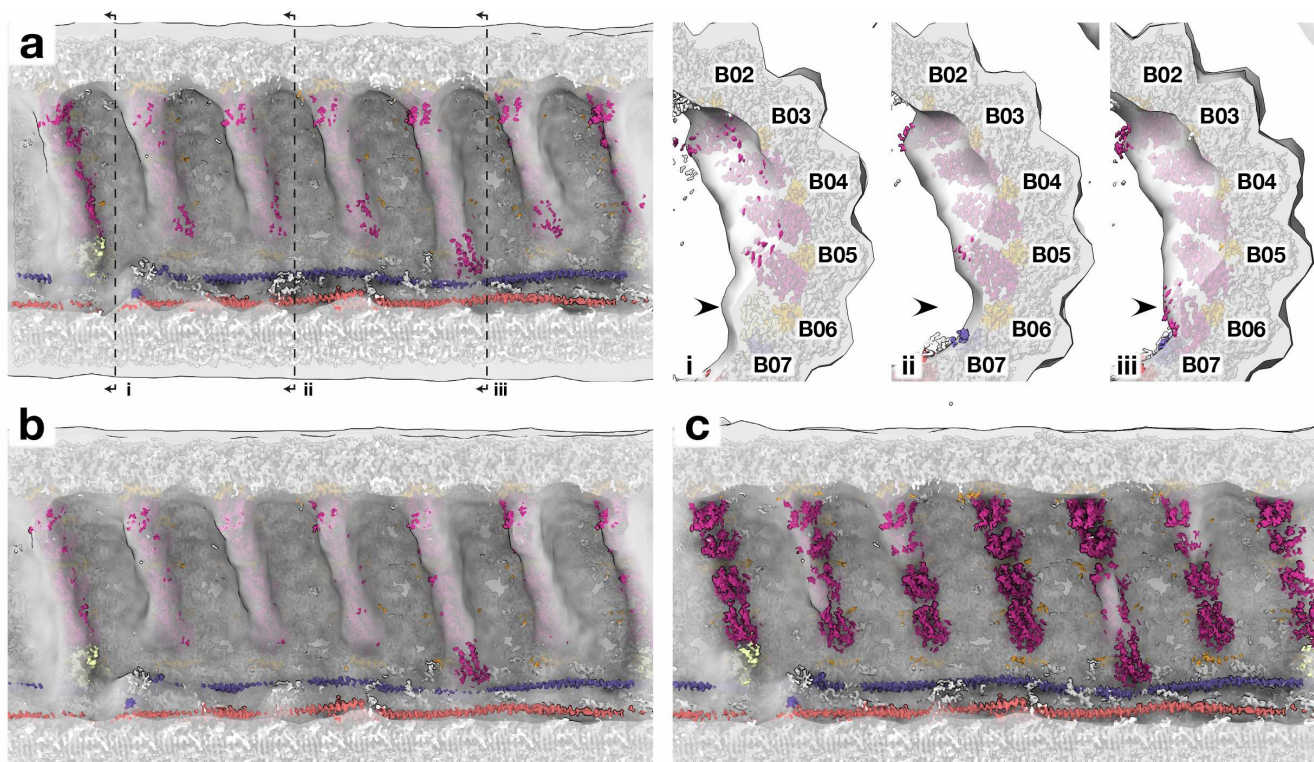

**Fig. 9. Prominent ladder-like densities in the B-tubule are present in pig sperm and horse sperm, with shorter shelf-like protrusions mouse sperm.** Single-particle cryo-EM reconstruction of bovine sperm DMTs (this study) docked into in situ subtomogram averages of (a) pig sperm (EMD-12070), (b) horse sperm (EMD-12078), and (c) mouse sperm (EMD-12133). In (a), panels (i) to (iii) illustrate how the pattern of long and short ladder rungs visible in the subtomogram averages is consistent with the periodicity observed in the high-resolution single-particle structure. The ladder rungs are formed by neighboring copies of SPACA9, which bind close to the inter-protofilament interface. In every 48-nm repeat, there are 6 ladder rungs. There is one long rung (four copies of SPACA9 from B02-B06 plus one unassigned protein at B06/B07) (i), followed by three short rungs (four copies of SPACA9 from B02-B06) (ii), followed by another long rung (five copies of SPACA9 from B02-B07) (iii), followed finally by one short rung.

precisely matches the density profile of the MIP, barring a C-terminus that is predicted to be disordered and for which AlphaFold confidence scores are lower (Fig. S6). Every 8-nm, there are four copies of SPACA9 that each bind to the inter-protofilament regions of B02-B06 (Fig. 8a). Specifically, SPACA9 interacts with both  $\alpha$ - and  $\beta$ -tubulin within a dimer while also interacting with the M-loop of  $\alpha$ -tubulin from the neighboring protofilament (Fig. 8e). Every 48-nm, one additional copy of SPACA9 binds between tubulin protofilaments B06/B07 (Fig. 8a). The B06/B07 interface is normally occluded by CFAP45, but once every 48-nm CFAP45 curves away from the interface, freeing a binding site for SPACA9 (Fig. 8d, arrowheads).

Every 48-nm there is another MIP (pale green) that binds close to the B06/B07 SPACA9 binding site (Fig. 8a). Unlike SPACA9, this as-yet-unidentified MIP does not seem to bind tubulin in protofilament B07, and instead seems to recognize CFAP45 because at its binding site CFAP45 still occludes the B06/B07 inter-protofilament interface (Fig. 8d). Nevertheless, this arrangement explains the varying lengths of the “ladder rungs” observed in subtomogram averages from mammalian sperm (Fig. 8a, 9a panels i to iii), i.e. every 48-nm repeat has one long rung (covering B02-B07)

followed by three short rungs (covering B02-B06), followed again by one long rung and finally by one short rung. As discussed above, the two long rungs are not identical – one is formed by the unidentified MIP (Fig. 8a, 9a panel i) and the other by an additional copy of SPACA9 (Fig. 8a, 9a panel iii). Intriguingly, subtomogram averages from mouse sperm appear to have fewer MIPs in this region (Fig. 9c), having shorter shelf-like protrusions rather than the extensive ladder-like rungs seen in pig and horse<sup>12,33</sup>.

#### Endpiece singlet microtubules share MIPs with the B-tubule of the axonemal doublets.

At the end of the principal piece, the characteristic structure of the axoneme is lost and DMTs transition into singlet MTs (SMTs)<sup>12,34</sup>. The region comprising mainly SMTs ensheathed by the plasma membrane is known as the endpiece. Cryo-ET and subtomogram averaging resolved discontinuous intraluminal spirals in endpiece SMTs from the sperm of several mammals<sup>12,19</sup>. Because these discontinuous spirals resemble the ladder-like ridges in the B-tubule, we sought to determine whether the two structures are made up of similar MIPs. To address this, we determined high-resolution structures of endpiece SMTs from whole bovine sperm (Fig. 11). To best preserve the native structure of endpiece SMTs, we imaged

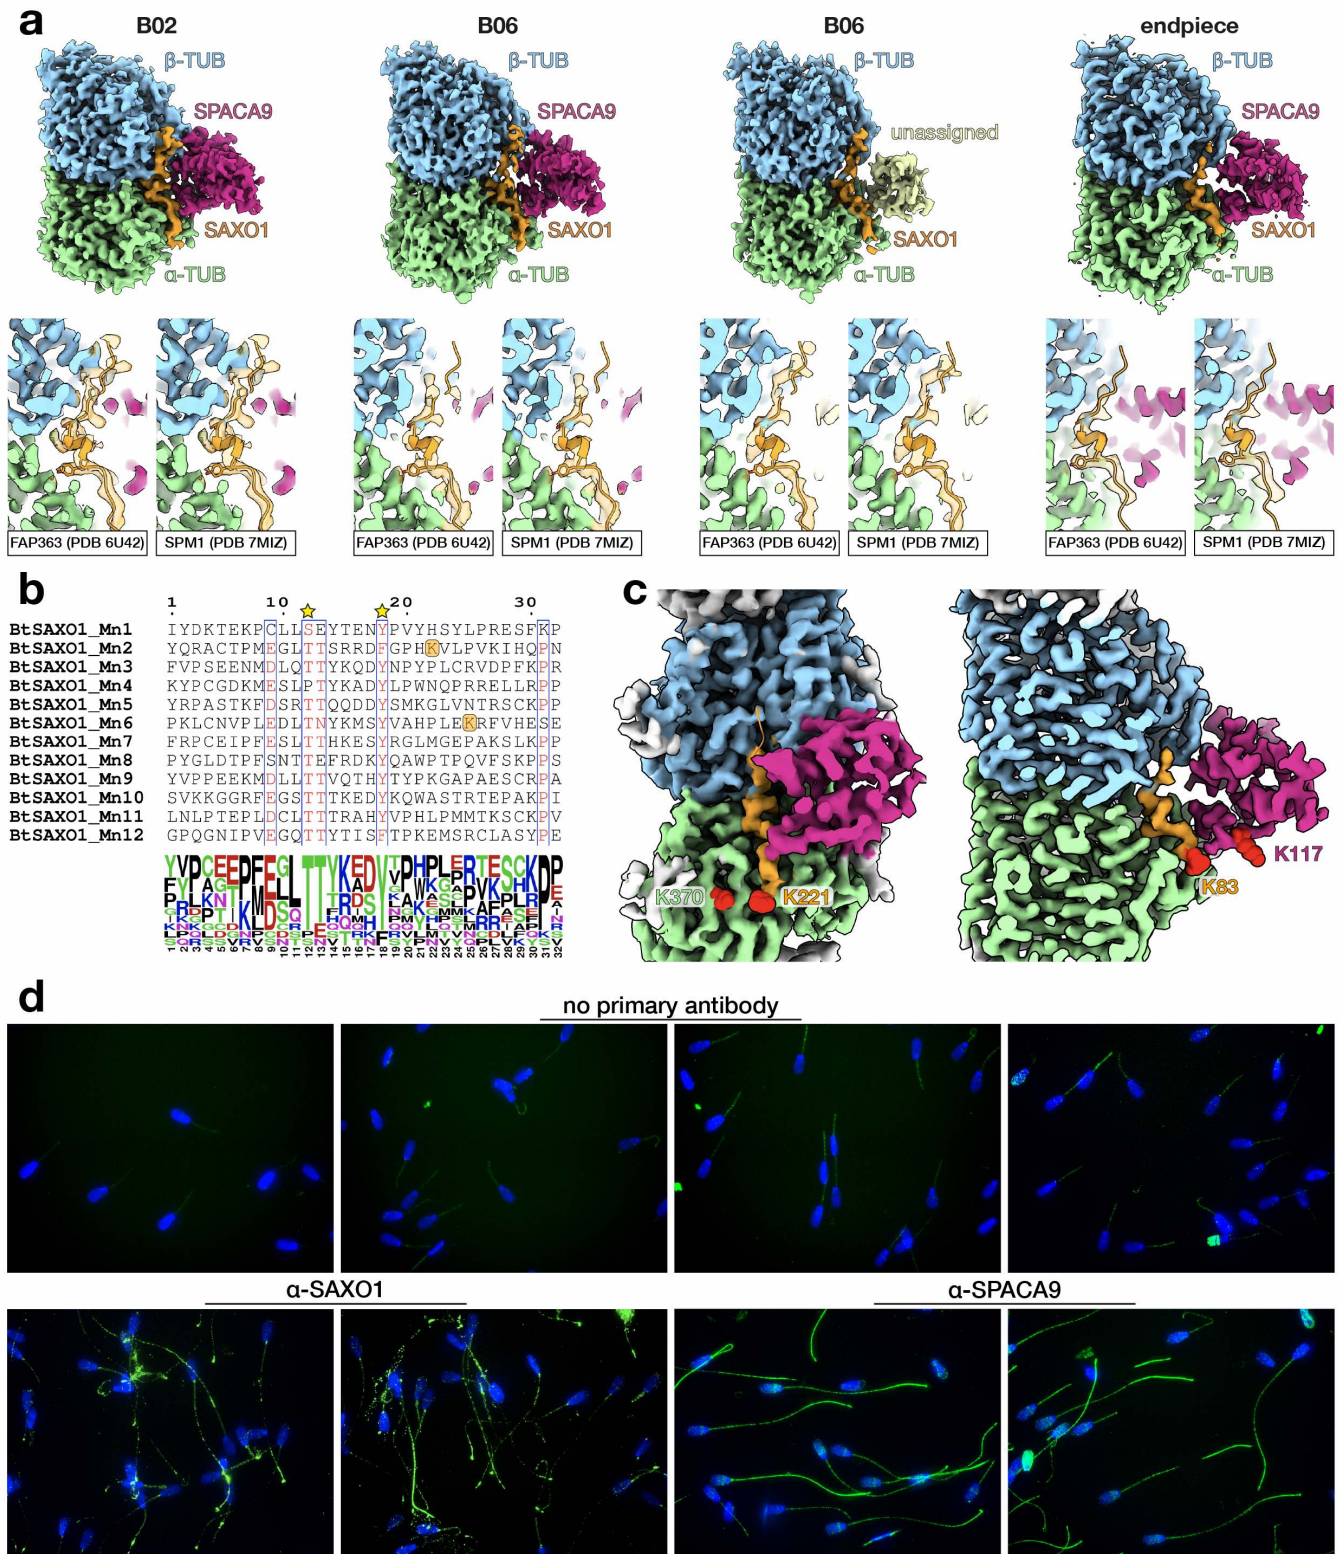

**Fig. 10. Additional data supporting the assignment of SAXO1 and SPACA9.** (a) Top panels: extracted density for individual tubulin dimers and associated MIPs from protofilaments B02 and B06, and from the endpiece. Bottom panels: atomic models of the Mn motifs of FAP363 from *Chlamydomonas* DMTs<sup>5</sup> and SPM1 from *Toxoplasma* cortical MTs<sup>30</sup> fitted into the density for the filamentous MIP in bovine sperm B-tubules and endpiece DMTs. (b) Sequence alignment of the 12 Mn motifs within *Bos taurus* SAXO1 shows the consensus Thr and Tyr residues (stars) demarcating the short helix that binds at the alpha/beta-tubulin interface. Orange squares mark lysine residues (K83 and K221) that cross-linked to SPACA9 and alpha-tubulin respectively. (c) In-cell cross-linking mass spectrometry detects interactions between SAXO1 and alpha tubulin (left); and between SAXO1 and SPACA9 (right). Red spheres indicate the cross-linked lysine residues. (d) Immunofluorescence confirms that both SAXO1 and SPACA9 are present in bovine sperm flagella.

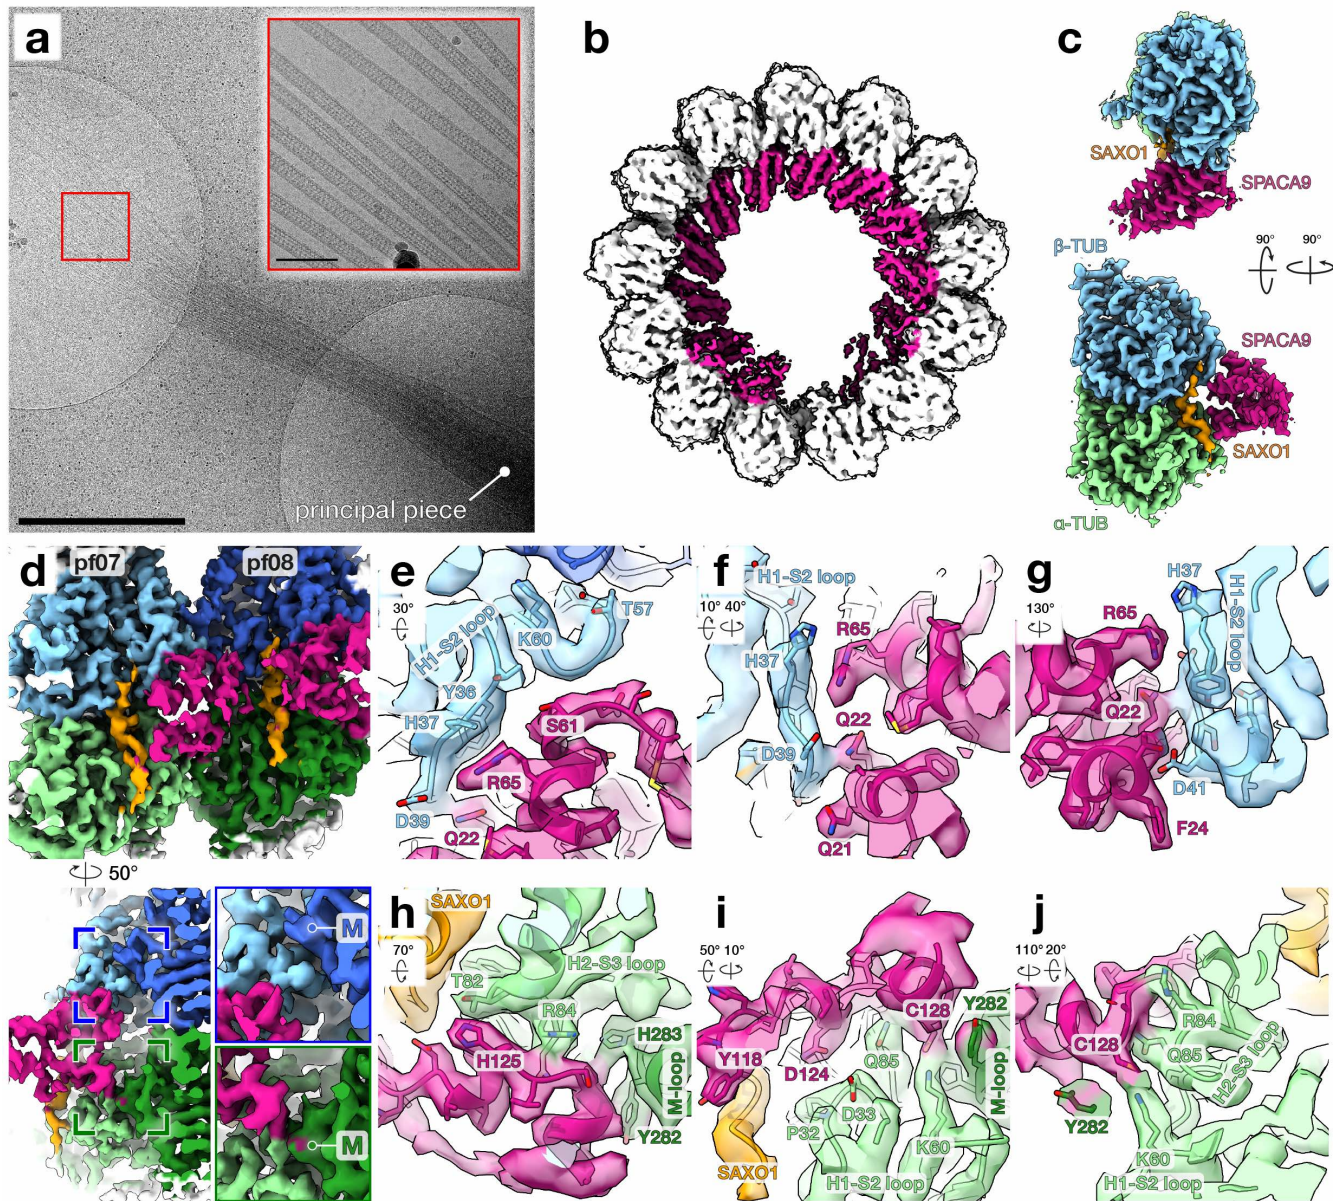

**Fig. 11. Cryo-electron microscopy of singlet microtubules in frayed endpieces of whole bovine sperm.** (a) Cryo-EM image of a frayed sperm endpiece on a holey carbon grid. Note how the fibrous sheath, which demarcates the principal piece, remains intact (along with, in this case, the plasma membrane around it). Scale bar: 1  $\mu$ m. Inset: High-magnification cryo-EM image of endpiece singlet microtubules (SMTs) captures a ladder-like luminal structure with an  $\sim$ 8-nm periodicity. Scale bar: 100 nm. (b) Cryo-EM reconstruction of endpiece SMTs (lowpass-filtered to 5  $\text{\AA}$ ) reveals that the discontinuous intraluminal spirals consist of predominantly alpha-helical microtubule inner proteins (MIPs) projecting into the lumen. (c) Map of the asymmetric unit obtained after symmetry expansion reveals that SPACA9 and SAXO1 are also MIPs in endpiece SMTs. (d) Top panel: Luminal view of the inter-protofilament interface obtained from local refinement of protofilaments 7 and 8. Bottom panel: Rotated and clipped view showing how SPACA9 interacts with both  $\alpha$  and  $\beta$ -tubulin, along with the M-loop of  $\alpha$ -tubulin from the neighboring protofilament (green box) but not the M-loop of the neighboring  $\beta$ -tubulin (blue box). (e-g) Close-up views of interactions between SPACA9 and the H1-S2 loop of  $\beta$ -tubulin. (h-j) Close-up views of interactions between SPACA9 and the H1-S2 and H2-S3 loops of  $\alpha$ -tubulin. Note how SPACA9 also interacts with SAXO1 (i) and the M-loop of  $\alpha$ -tubulin from the neighboring protofilament (h,i). Arrows under panel labels in (e-j) indicate how the zoomed-in views are rotated relative to the top panel in (d).

416 whole untreated bovine sperm and searched for endpieces 421 at global nominal resolutions of  $\sim$ 4.3  $\text{\AA}$  (Fig. 11b,  
 417 that had spontaneously frayed during sample preparation, 422 Fig. S7b). Mammalian sperm endpiece SMTs are 13-  
 418 likely due to shear forces on the membrane either from 423 protofilament microtubules with a rise of 9.57  $\text{\AA}$  and a twist  
 419 centrifugation, pipetting, or blotting (Fig. 11a). 424 of  $-27.71^\circ$  as estimated by `reliion_helix_toolbox`. To improve  
 420 We resolved C1 structures of bovine sperm microtubules 425 the cryo-EM density towards identifying MIPs in endpiece

SMTs, we performed symmetry expansion, protofilament-based subtraction, 3D classification, and local refinement similar to the strategy described in<sup>35</sup>. This resulted in a ~3.5-Å map with well-resolved side chain densities, which greatly facilitated interpretation, protein identification, and model building (Fig. S7b-e). Our cryo-EM maps allow us to identify the MIPs as SPACA9 and SAXO1 (Fig. 11c, 10-S7), which are shared between endpiece SMTs and the B-tubule of DMTs. To analyze how SPACA9 interacts with tubulin, we fit models of the asymmetric unit derived from the symmetry-expanded maps into locally-refined maps of protofilaments 07 and 08 (Fig. 11d-g). Within a dimer, SPACA9 makes contacts with the H1-S2 loop of  $\beta$ -tubulin (Fig. 11e-g) and interacts with both the H1-S2 and H2-S3 loops of  $\alpha$ -tubulin (Fig. 11h-j).

The SPACA9 binding mode in endpiece SMTs is similar to that of SPACA9 in the B-tubule of axonemal DMTs; specifically, SPACA9 interacts with the M-loop of  $\alpha$ -tubulin in the neighboring protofilament (Fig. 11h-i) but is too far to interact with the corresponding M-loop of the neighboring  $\beta$ -tubulin (Fig. 11d, bottom panel). SPACA9 also interacts close to the Mn motif of SAXO1 (Fig. 11i), which is consistent with cross-links identified between SPACA9 Lys117 and SAXO1 Lys83, which is close to an Mn motif (Fig. 10b,c). The difference in protofilament curvature between endpiece SMTs and the B-tubule means that the rotation between neighboring SPACA9 molecules also differs between SMTs and DMTs (Fig. 12a), reflecting the hinge-like flexibility of the M-loops at the inter-protofilament interface (Fig. 12b).

## Discussion

In this study, we used cryo-EM to solve structures of axonemal DMTs and endpiece SMTs from mammalian sperm, revealing extensive ornamentation by sperm-MIPs. Ciliary MIPs have been shown to stabilize microtubules<sup>36,37</sup>, so the elaborate interaction networks formed by sperm-MIPs likely serve to further reinforce the microtubule lattice itself against the large mechanical stresses involved in bending the long, stiff flagella of mammalian sperm. In particular, the outer dense fibers make the axoneme more rigid while also increasing its effective diameter and thus concomitantly increasing bending torque, entraining more dyneins with every bend<sup>15</sup>. Because interactions between protofilaments are weaker than interactions between tubulin monomers along a protofilament<sup>38,39</sup>, protofilaments can slide relative to one another, conferring shearability onto the microtubule. Protofilament-bridging MIP networks could act as structural braces to decrease inter-protofilament shearing, thus increasing microtubule bending stiffness.

Whereas axoneme structure has been studied extensively, the distal region of the cilium – called the endpiece in sperm flagella – is much more poorly understood<sup>40</sup>. The endpiece consists only of SMTs and lacks dynein motors and other axonemal complexes. Mathematical modelling suggests that the presence of an inactive non-bending distal region has important effects on the ciliary waveform<sup>41</sup>. Our structures

show conclusively that endpiece SMTs share MIPs with the B-tubule of axonemal DMTs, specifically the MIPs SAXO1 and SPACA9. Given that endpiece SMTs are derived from both the A- and B-tubules of axonemal DMTs in mammalian sperm<sup>12,34</sup>, all the MIPs in the A-tubule must at some point be replaced with SPACA9 and SAXO1. Precisely how this transition occurs and what signals it are important questions for future work.

From a structural perspective, endpiece SMTs in mammalian sperm are very similar to cortical MTs from the parasite *Toxoplasma gondii* (Fig. 12c). Both microtubules are stabilized by filamentous Mn motif-containing MIPs that bind longitudinally along protofilaments (SPM1 in *Toxoplasma* and SAXO1 in sperm). Both microtubules are further stabilized by MIPs that bind across protofilaments, although in this case the MIPs (TrxL1/2 in *Toxoplasma* and SPACA9 in sperm) are structurally-unrelated. This points to similar architectural principles for stabilizing microtubules from the lumen, which are likely to be more widespread given that similar protofilament-spanning MIP densities have also been observed in *Plasmodium* gliding forms<sup>42</sup>.

Beyond providing insights into sperm biology, our cryo-EM structures, together with recent maps of DMTs from bovine respiratory cilia, paint a concrete and detailed portrait of the molecular and architectural diversity of motile cilia across different cell types within an organism. However, while the Human Protein Atlas reports expression of many sperm-MIPs as testis-enriched<sup>24</sup>, a number have been reported in other ciliated cell types as well. For example, PPP1R32 was detected in ependymal cilia in brain ventricles<sup>43</sup>, while CFAP77 and SPACA9 were detected in ciliated airway cells<sup>44</sup>. It is possible that these MIPs are not strictly sperm-specific, but that their expression along or around the sperm axoneme is more widespread than in other ciliated cell types. Indeed, PPP1R32, CFAP77, SPACA9, and TTBP were detected in proteomics of the same bovine tracheal axoneme samples used to obtain cryo-EM maps in<sup>6</sup>. It is possible that these MIPs were not resolved in cryo-EM maps of respiratory cilia because their expression is restricted to only a few of the nine DMTs or to a shorter region along the axoneme. Consistent with this hypothesis, subtomogram averages obtained from different regions of bovine respiratory cilia showed ladder-like ridges resembling those formed by SPACA9, but only in the transition zone<sup>14</sup>.

Our study also raises fascinating evolutionary questions – how does ornamentation with extra sperm-MIPs correlate with the appearance of flagellar accessory structures? Because accessory structures are thought to prevent buckling instabilities when sperm swim through viscous media<sup>18</sup>, how do sperm-MIPs likewise vary across internally- and externally-fertilizing species? Sperm from external fertilizers such as sea urchin<sup>9</sup> and zebrafish<sup>45</sup> do not appear to have as many MIPs as their mammalian counterparts<sup>12,20,21</sup>. The natural diversity of sperm form<sup>46</sup> thus presents a unique opportunity to understand the evolution and diversification of a core cellular machine; with the approaches we describe in this work, this question can now be addressed from a

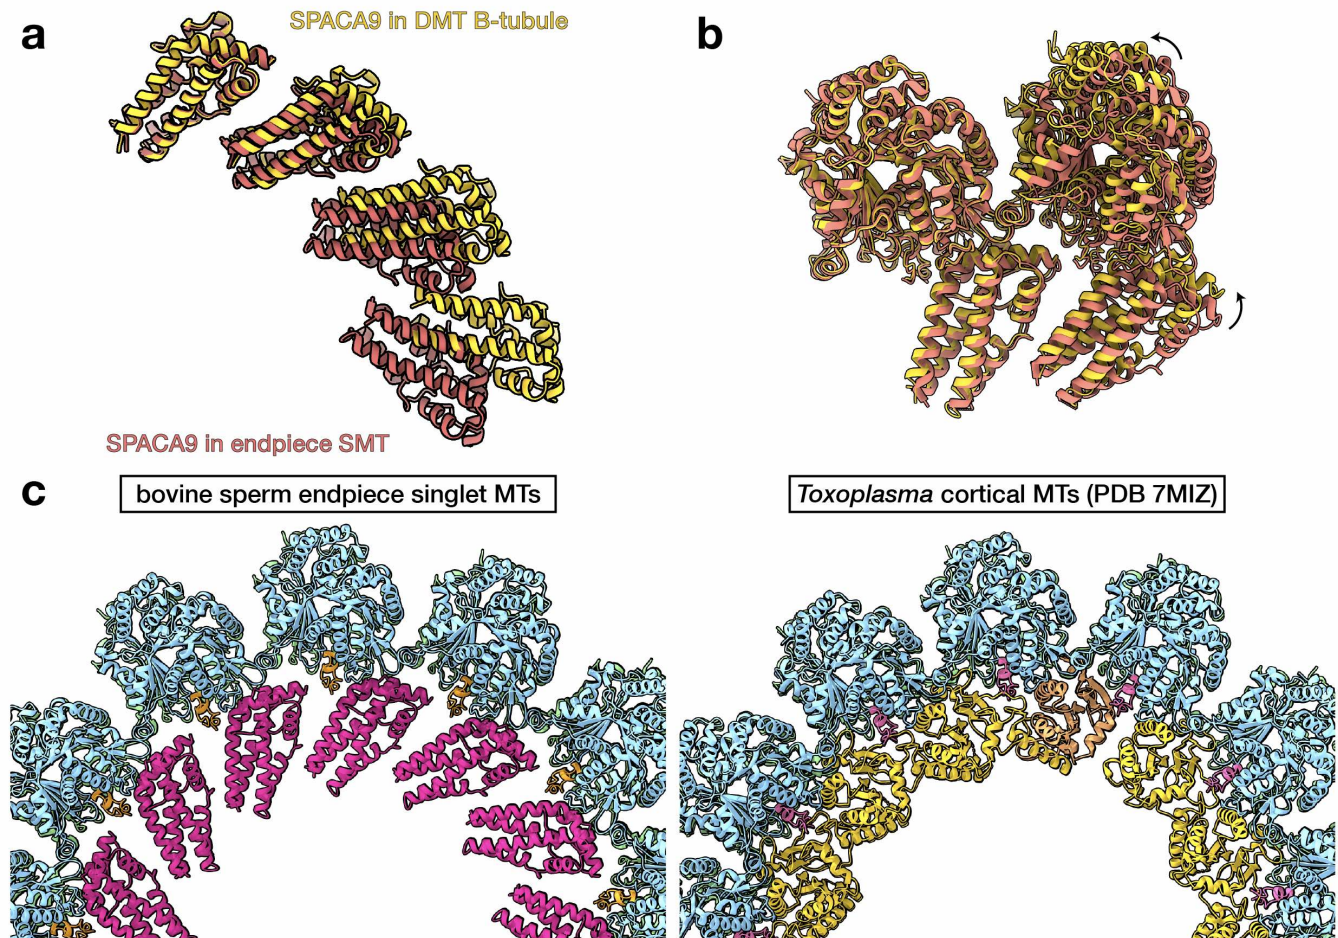

**Fig. 12. Comparing sperm endpiece singlet microtubules with sperm doublet microtubules and *Toxoplasma* cortical microtubules.** (a) SPACA9 is shared between endpiece singlets and the B-tubule of axonemal doublets, and the SPACA9 arrays reflect underlying differences in protofilament curvature between the two microtubules. (b) Overlay of two neighboring  $\alpha/\beta$ -tubulin/SAXO1/SPACA9 units from the DMT B-tubule (gold) and from the endpiece SMT (coral). Note the hinge-like motion centered on the M-loops. (c) Atomic models of bovine sperm endpiece microtubules and *Toxoplasma gondii* cortical microtubules (PDB 7MIZ) 30 show similar MIP arrangements. SAXO1 in mammalian sperm shares a binding mode with SPM1 in *Toxoplasma*, while SPACA9 in mammals partly shares a binding interface with Trx1/2 in *Toxoplasma*. While SAXO1 and SPM1 are members of the same protein family, SPACA9 and Trx1/2 are structurally unrelated.

539 truly molecular level, integrating perspectives from genomic, 557  
540 proteomic, and structural methods. 558

541 For example, our structures raise questions about the 559  
542 nature and evolution of Tektin-5. While all other Tektins 560  
543 form filaments through similar intermolecular interactions, 561  
544 Tektin-5 adopts a range of conformations in the sperm 562  
545 DMT. Tektin-5 appears to be testis-specific, and recent 563  
546 bioinformatics analyses 47 concluded that Tektin-3 and 564  
547 Tektin-5 arose from duplication of the Tektin-3/5 gene in 565  
548 early vertebrates; interestingly, Tektin-5 was subsequently 566  
549 lost in several species of teleost fish, including the zebrafish 567  
550 *Danio rerio*, and amphibians, including the frog *Xenopus* 568  
551 *laevis*. This may explain why the A-tubule in zebrafish 569  
552 sperm DMTs appear more “empty” than their mammalian 570  
553 counterparts 45. Loss of Tektin-5 does not appear to 571  
554 correlate with fertilization mode, as it was lost in both the 572  
555 externally-fertilizing *X. laevis* and the internally-fertilizing 573  
556 *Notophthalmus viridiscens* (Eastern newt), but retained in 574

the externally-fertilizing fish species *Lepisosteus oculatus*  
(spotted gar) and *Clupea harengus* (herring) 47. These  
observations raise questions about the functional roles of  
Tektin-5. Mice deficient in Tektin-2 or -4 are infertile  
or subfertile respectively 48,49, and mice lacking Tektin-3  
have reduced sperm motility and forward progression despite  
showing normal fertility 50. While the effects of Tektin-  
1 deficiency on sperm have not been explicitly tested, loss  
of Tektin-1 causes ciliary defects in zebrafish 51. These  
phenotypes and our structures would predict that disrupting  
Tektin-5 would affect sperm motility and male fertility;  
however, there is currently no literature on the effects of  
genetically-ablating Tektin-5, which is clearly an important  
target for further research into sperm motility.

In contrast, mouse knockouts for several MIPs identified  
in our cryo-EM structures have in fact been reported in  
the literature. These include TEX43 52, C7ORF31 53,  
SPACA9 54, SAXO1 55, SMRP1, and TEPP 56. In all cases,

575 knockout mice were fertile; this is not necessarily surprising 619  
576 given that a certain degree of robustness can be expected 620  
577 for essential processes such as those related to fertilization  
578 and reproduction. Such robustness has previously been 621  
579 observed in motile cilia, where *Chlamydomonas* mutants 622  
580 for three inner junction proteins FAP20, FAP45, and 623  
581 FAP52 nonetheless retained some attached inner junctions 624  
582 <sup>36</sup>. Furthermore, the absence of a male infertility phenotype 625  
583 does not exclude the possibility of more subtle effects on 626  
584 motility; for instance, sperm from TEX43-deficient mice did 627  
585 show reduced velocity parameters <sup>52</sup>. It is also possible 628  
586 that infertility only results when several sperm-MIPs are 629  
587 knocked out simultaneously. By identifying many of the 630  
588 sperm-MIPs, our structures now serve as valuable resources 631  
589 for targeted functional and genetic studies aimed at dissecting 632  
590 the roles of individual proteins on sperm motility. In a similar 633  
591 vein, our work could also provide a structural framework for 634  
592 understanding male infertility, which is on the rise globally 635  
593 <sup>57,58</sup> yet remains unexplained in many cases <sup>59</sup>.

## 594 Acknowledgements 638

595 The authors thank Dr. H Henning and A Rijnveld of the 639  
596 Utrecht University Veterinary Faculty for providing bovine 640  
597 sperm. The authors acknowledge Ingr. CTWM Schneij- 641  
598 denberg and JD Meeldijk for managing and maintaining the 642  
599 Utrecht University EM Facility. The authors thank Dr. M 643  
600 Vanevic for computational support, and Dr. SC Howes for 644  
601 valuable discussions on data collection and processing strate- 645  
602 gies. The authors also thank Prof. A Akhmanova for critical 646  
603 reading of the manuscript. This project benefitted from 647  
604 access to the Netherlands Centre for Electron Microscopy 648  
605 (NeCEN) with support from operator Dr. W Noteboorn. 649  
606 RZC, JFH, and AJRH acknowledge support from the NWO 650  
607 X-omics Road Map program project 184.034.019. This work 651  
608 was funded by NWO Start-Up Grant 740.018.007 to TZ. 652

## 609 Author Contributions 654

610 MRL and MCR prepared sperm samples. MRL and 655  
611 MCR collected and processed cryo-EM data. MRL and 656  
612 TZ analyzed data and built atomic models. RZC and JH 657  
613 performed proteomics and cross-linking mass spectrometry 658  
614 experiments and corresponding data analysis, supervised by 659  
615 AJRH. MRL and TZ wrote the manuscript, and all authors 660  
616 contributed to revisions. 661

## 617 Declaration of Interests 663

618 The authors declare no competing interests. 664

## Materials and Methods

### Cryo-EM of Doublet Microtubules.

**Sample preparation.** Frozen bovine semen straws from the Utrecht University Veterinary Faculty were thawed rapidly in a 37°C water bath. Sperm cells were washed twice in 1X Dulbecco's phosphate-buffer saline (DPBS, Sigma) and counted. To remove membranes and the mitochondrial sheath <sup>22</sup>, sperm were diluted to  $\sim 1-2 \times 10^5$  cells/mL in demembration buffer (20 mM Tris-HCl pH 7.9, 132 mM sucrose, 24 mM potassium glutamate, 1 mM MgSO<sub>4</sub>, 1 mM DTT, and 0.1% Triton X-100), frozen at -20°C for 48-96 h, then thawed. To induce sliding disintegration, ATP (Sigma) was added to a final concentration of 1 mM and the solution incubated for 10-15 min at room temperature. Axoneme disintegration was verified under an inverted light microscope.

Approximately 4  $\mu$ L of disintegrated sperm suspension was applied to glow-discharged Quantifoil R 2/1 200-mesh holey carbon grids, which were then blotted from the back for  $\sim 5-6$  s using a manual plunger (MPI Martinsried, Germany). Grids were plunged into a liquid ethane/propane mix (37% ethane) cooled to liquid nitrogen temperatures. Grids were clipped into Autogrids (ThermoFisher) and stored under liquid nitrogen until imaging.

**Cryo-electron microscopy.** A total of five datasets were collected for this study, from a total of 7 grids from 3 sperm straws. The first four were collected on a Talos Arctica (ThermoFisher) operated at 200 kV and equipped with a GIF Quantum K2. The last was collected on a Titan Krios (ThermoFisher) operated at 300 kV and equipped with a BioQuantum K3. For all datasets, the energy filter was operated in zero-loss mode with a 20-eV slit width. All images were collected in super-resolution mode with a total electron fluence of  $\sim 48-50$  e-/Å<sup>2</sup>, with  $\sim 1-1.1$  e-/Å<sup>2</sup> per frame. Acquisition areas were identified manually and images were collected semi-automatically in SerialEM <sup>60</sup>. Frames were motion-corrected on-the-fly using Warp <sup>61</sup> to monitor data quality during the session.

**Cryo-EM data processing.** All data processing was performed in Relion 3.1 <sup>62</sup> based on strategies described in <sup>5,6</sup>. Specific details of processing are reported in **Table S1**. The processing workflow is summarized in **Fig. S1**. Super-resolution frames were binned twice, motion-corrected, and dose-weighted using Relion's implementation of Motion-Cor2. The contrast transfer function (CTF) was estimated using CtfFind. Microtubules were picked manually and particles were extracted every  $\sim 82$  Å (the length of a tubulin dimer). For initial alignments, twice-binned particles were extracted with a box size of 336 ( $\sim 700$  Å, encompassing  $\sim 9$  tubulin dimers).

Global alignment parameters were first determined for the 8-nm particles through a C1 helical auto-refinement in Relion 3.1. The cryo-EM map of the doublet microtubule (DMT) from bovine respiratory cilia (EMD-24664) <sup>6</sup> filtered to 30-Å was used as an initial reference. To enrich for



674 fully-decorated DMTs, tubulin signal was subtracted and 3D 731  
675 classification performed with a mask covering MIPs bound to 732  
676 protofilaments B02-B06. Classes with well-resolved density 733  
677 were selected for further processing. Particles offset by 4 734  
678 nm were also identified at this stage and shifted back into 735  
679 register with the majority class. After checking for duplicate 736  
680 particles, the remaining particles were entered to a 3D auto- 737  
681 refinement, yielding a map of the 8-nm repeat. 738

682 To retrieve the 16- and 48-nm repeats, tubulin signal 739  
683 was subtracted and 3D classification performed first with a 740  
684 mask covering MIPs at the inner junction, then with a mask 741  
685 covering MIPs at the seam of the A-tubule. The resulting 742  
686 48-nm particles were re-extracted with a box size of 672 743  
687 and refined. After CTF refinement (magnification anisotropy 744  
688 correction, followed by per-particle defocus estimation and 745  
689 aberration correction) and Bayesian polishing, the nominal 746  
690 overall resolution of the final map was  $\sim 4$  Å. To further 747  
691 improve resolution, we performed local refinements, each 748  
692 with a cylindrical mask covering 2-3 protofilaments and 749  
693 extending along  $\sim 1/3$  of the 48-nm repeat (**Fig. S1**). We 750  
694 individually post-processed and sharpened the 30 locally- 751  
695 refined maps, then generated a composite map using the *fit* 752  
696 *in map* and *volume maximum* commands in ChimeraX <sup>63</sup>.  
697 We used the same strategy to generate composite half-maps 753  
698 to assess overall resolution, estimated at  $\sim 3.7$  Å, and local  
699 resolutions, estimated to reach  $\sim 3$  Å in the core of the A- 754  
700 tubule. 755

701 **Cryo-EM data processing.** Map interpretation was guided by 757  
702 the atomic model of the DMT from bovine respiratory cilia 758  
703 (PDB 7RRO) <sup>6</sup>. The positions of tubulin dimers and MIPs 759  
704 were manually adjusted by rigid body fitting in ChimeraX, 760  
705 followed by real-space refinement in Coot and in Phenix. 761  
706 The  $\alpha$ -tubulin sequences were mutated to match the most 762  
707 abundant isoform identified in sperm (TUBA3);  $\beta$ -tubulin 763  
708 sequences already corresponded to the most abundant sperm 764  
709 isoform (TUBB4B). Tubulin C-terminal tails and the  $\alpha$ -K40 765  
710 loop were manually built based on the density map. Models 766  
711 for MIPs already present in respiratory cilia were likewise  
712 truncated or extended based on the density. 767

713 Unknown MIPs were identified using a workflow based 768  
714 on the findMySequence program <sup>23</sup>. Briefly, starting poly- 769  
715 Ala models were manually built into the map using ‘Place 770  
716 Helix Here’ or ‘Place Strand Here’ tools in Coot, manually 771  
717 extended when the density permitted, then real-space refined 772  
718 in Coot. The findMySequence program was then used to 773  
719 estimate side chain probabilities and to query a database 774  
720 consisting of the 1500 most abundant proteins in bovine 775  
721 sperm (see section “Mass spectrometry”). Once confident 776  
722 protein identities were obtained, findMySequence was also 777  
723 used to assign sequences to the query poly-Ala model. The 778  
724 models were then manually extended using the positions of 779  
725 bulky side chains as guideposts.

726 This workflow was first validated on known MIPs, like 780  
727 RIBC2, and could reliably distinguish between closely- 781  
728 related paralogs like Tektins1-4 (**Fig. S3a**). Backbone traces 782  
729 were generally sufficient for findMySequence to identify 783  
730 MIPs of varying lengths and folds (**Fig. S3b**); however, 784

in the case of DUSP21, running findMySequence directly  
on traceable secondary structure elements did not yield a  
hit. Querying the DALI server <sup>64</sup> returned dual-specificity  
phosphatase domains as hits. The top hit (PDB 5Y16) <sup>65</sup>  
was mutated to polyAla and fitted into the density map of  
the unknown MIP. Running findMySequence on this model  
returned DUSP21 as a confident hit (**Fig. S3c**). For SPACA9,  
findMySequence could assign protein identity, but it was  
initially difficult to fully trace the backbone (**Fig. S3d**). The  
high-confidence AlphaFold2 prediction <sup>66</sup> for SPACA9 was  
thus used to facilitate model building.

For the first round of real-space refinement in Phenix,  
the 48-nm repeat was divided into several PDB files  
corresponding to each MIP or to each protofilament of the  
doublet. Each model was refined individually, then manually  
inspected in Coot. For subsequent rounds, PDB files were  
merged into a single model of the 48-nm repeat, which  
was refined as a whole against the composite map. The  
refined structures were used to measure inter-protofilament  
angles and inter-dimer distances, which were estimated  
in ChimeraX using the align and distance commands  
respectively.

#### Cryo-EM of Endpiece Singlet Microtubules.

**Sample preparation.** Frozen bovine semen straws from the  
Utrecht University Veterinary Faculty were thawed rapidly  
in a 37°C water bath. Sperm cells were washed twice in  
1X DPBS (Sigma) and counted. Sperm concentration was  
adjusted to  $\sim 1-3 \times 10^6$  cells/mL. Approximately 4  $\mu$ L of  
untreated sperm suspension was applied to glow-discharged  
Quantifoil R 2/1 200-mesh holey carbon grids, which were  
then blotted from the back for  $\sim 4-6$  s using a manual plunger  
(MPI Martinsried, Germany). Grids were plunged into  
either liquid ethane or a liquid ethane/propane mix (37%  
ethane) cooled to liquid nitrogen temperatures. Grids were  
clipped into Autogrids (ThermoFisher) and stored under  
liquid nitrogen until imaging.

**Cryo-electron microscopy.** Cryo-EM data for endpiece sin-  
glet microtubules was collected over 7 imaging sessions from  
a total of 8 grids from 3 sperm straws. Grids were imaged on  
a Talos Arctica (ThermoFisher) operated at 200 kV. The mi-  
croscope was additionally equipped with a GIF energy filter  
(Gatan), which was operated in zero-loss mode with a 20-  
eV slit width. All images were collected in counting mode  
on a K2 Summit direct electron detector (Gatan) with a to-  
tal electron fluence of  $\sim 48-50$  e-/Å<sup>2</sup>, with  $\sim 1-1.1$  e-/Å<sup>2</sup> per  
frame. Acquisition areas were identified manually and im-  
ages were collected semi-automatically in SerialEM. Frames  
were motion-corrected on-the-fly using Warp to monitor data  
quality during the session.

**Cryo-EM data processing.** All data processing was per-  
formed in Relion 3.1 unless otherwise noted. Specific de-  
tails of processing are reported in **Table S1**. The processing  
workflow is summarized in **Fig. S7**. Frames were motion-  
corrected and dose-weighted using Relion’s implementation

785 of MotionCor2. The contrast transfer function (CTF) was es- 840  
786 timated using gctf. Microtubules were picked manually and 841  
787 particles were extracted every  $\sim 82$  Å (the length of a tubu- 842  
788 lin dimer) with a box size of 432 ( $\sim 587$  Å, encompassing  $\sim 7$  843  
789 dimers). 844

790 An initial C1 helical auto-refinement was performed 845  
791 using a  $\sim 20$ -Å subtomogram average of pig endpiece singlet 846  
792 microtubules (EMD-12068) <sup>12</sup> as a reference, resulting in 847  
793 a  $\sim 4.8$ -Å map. To improve particle alignments towards 848  
794 an improved C1 reconstruction, the microtubule Relion- 849  
795 based pipeline (MiRPPv2) was used to perform rotation 850  
796 angle smoothing, XY shift smoothing, and seam correction 851  
797 <sup>67,68</sup>. Aligned, seam-corrected particles were then subjected 852  
798 to a round of C1 helical auto-refinement with restricted 853  
799 searches and a mask encompassing the central 40% of the 854  
800 microtubule. This resulted in a C1 reconstruction at  $\sim 4.6$ -Å 855  
801 resolution, which was improved to  $\sim 4.3$ -Å after two rounds 856  
802 each of CTF refinement and Bayesian polishing. Local 857  
803 refinements of protofilaments 7/8 improved resolution to  $\sim 4$ - 858  
804 Å. 859

805 To improve MIP densities, symmetry-expansion was 860  
806 performed on the dataset based on helical parameters 861  
807 estimated from relion\_helix\_toolbox (rise =  $9.57$  Å, twist 862  
808 =  $-27.7^\circ$ ) <sup>35</sup>. Particle subtraction was first run with 863  
809 a mask covering four tubulin dimers of the “good” 864  
810 protofilament opposite the seam (protofilament 7), followed 865  
811 by 3D classification of the resulting particles without image 866  
812 alignment. The class with the best MIP density was selected 867  
813 and entered into a local refinement with a mask on two 868  
814 central tubulin dimers. This resulted in a  $\sim 3.5$ -Å map with 869  
815 well-resolved side chain densities that we used for protein 870  
816 identification and model building. 871

817 **Model building and refinement.** Modelling was based on 872  
818 the cryo-EM map of one asymmetric unit (one copy each 873  
819 of alpha- and beta-tubulin, SPACA9, and an Mn motif of 874  
820 SAXO1) obtained after symmetry expansion. To model 875  
821 the tubulin dimer, a model of porcine tubulin from PDB 876  
822 3JAS <sup>69</sup> was used as a starting model and mutated to 877  
823 match the appropriate bovine tubulin sequences. Tubulin 878  
824 isoforms (TUBA3 and TUBB4B) were chosen based on 879  
825 abundance from proteomics data and on side chain density at 880  
826 distinguishing residues. To model the Mn motif of SAXO1, 881  
827 SPM1 from PDB 7MIZ <sup>30</sup> was used as a starting model. 882  
828 Residues were then mutated to match the (arbitrarily chosen) 883  
829 sixth Mn motif of bovine SAXO1. To model SPACA9, 884  
830 an AlphaFold model was initially used, and residues not 885  
831 resolved in the map were deleted from the C-terminus. The 886  
832 combined model was real-space refined in Phenix, manually 887  
833 adjusted in Coot, and finally real-space refined in Phenix. 888

## 834 **Mass spectrometry.**

835 **Cross-linking, lysis, digestion, and peptide fractionation.** All 892  
836 proteomics and cross-linking mass spectrometry experiments 893  
837 were performed essentially according to <sup>70</sup> on bovine 894  
838 sperm prepared as described above. The sperm cells were 895  
839 resuspended in  $540$   $\mu$ L of PBS and supplemented with DSSO 896

(ThermoFisher Scientific) to a final concentration of  $1$  mM. The reaction was incubated for  $30$  min at  $25^\circ\text{C}$  with  $700$  rpm shaking in a ThermoMixer C (Eppendorf) and subsequently quenched for  $20$  min by adding Tris-HCl (final concentration  $50$  mM). Cells were centrifuged at  $13800\times g$  for  $10$  min at  $4^\circ\text{C}$ , and the supernatant was replaced with lysis buffer. Cells were resuspended in  $1$  mL of lysis buffer ( $100$  mM Tris-HCl pH  $8.5$ ,  $7$  M Urea,  $1\%$  Triton X-100,  $5$  mM TCEP,  $30$  mM CAA,  $10$  U/ml DNase I,  $1$  mM  $\text{MgCl}_2$ ,  $1\%$  benzonase (Merck Millipore, Darmstadt, Germany),  $1$  mM sodium orthovanadate, phosphoSTOP phosphatases inhibitors, and cCompleteTM Mini EDTA-free protease inhibitors) and lysed with the help of sonication ( $2$  minutes with UP100H from Hielscher at  $80\%$  amplitude). The proteins were then precipitated and resuspended in digestion buffer ( $100$  mM Tris pH  $8.5$ ,  $1\%$  sodium deoxycholate [Sigma-Aldrich],  $5$  mM TCEP, and  $30$  mM CAA). Trypsin and Lys-C proteases were added to a  $1:25$  and  $1:100$  ratio (weight/weight), respectively, and protein digestion performed overnight at  $37^\circ\text{C}$  shaking at  $1300$  rpm on ThermoMixer C. Peptides were then desalted with Oasis HLB plates (Waters) and fractionated with an Agilent 1200 HPLC pump system (Agilent) coupled to a strong cation exchange (SCX) separation column (Luna SCX  $5$   $\mu$ m to  $100$  Å particles,  $50\times 2$  mm, Phenomenex), resulting in  $24$  fractions. Each fraction was then desalted with OASIS HLB plate.

**Liquid chromatography with mass spectrometry.** Before injecting each SCX fraction,  $1,000$  ng of peptides from each biological replicate were first injected onto an using an Ultimate3000 high-performance liquid chromatography system (ThermoFisher Scientific) coupled online to an Orbitrap HF-X (ThermoFisher Scientific). For this classical bottom-up analysis, we used the following parameters as in <sup>71</sup>: Buffer A consisted of water acidified with  $0.1\%$  formic acid, while buffer B was  $80\%$  acetonitrile and  $20\%$  water with  $0.1\%$  formic acid. The peptides were first trapped for  $1$  min at  $30$   $\mu$ L/min with  $100\%$  buffer A on a trap ( $0.3$  mm by  $5$  mm with PepMap C18,  $5$   $\mu$ m,  $100$  Å; ThermoFisher Scientific); after trapping, the peptides were separated by a  $50$ -cm analytical column packed with C18 beads (Poroshell 120 EC-C18,  $2.7$   $\mu$ m; Agilent Technologies). The gradient was  $9$  to  $45\%$  B in  $95$  min at  $400$  nL/min. Buffer B was then raised to  $55\%$  in  $10$  min and increased to  $99\%$  for the cleaning step. Peptides were ionized using a spray voltage of  $2$  kV and a capillary heated at  $275^\circ\text{C}$ . The mass spectrometer was set to acquire full-scan MS spectra ( $350$  to  $1400$  mass/charge ratio) for a maximum injection time of  $120$  ms at a mass resolution of  $120,000$  and an automated gain control (AGC) target value of  $3 \times 10^6$ . Up to  $25$  of the most intense precursor ions were selected for MS/MS. HCD fragmentation was performed in the HCD cell, with the readout in the Orbitrap mass analyser at a resolution of  $15,000$  (isolation window of  $1.4$  Th) and an AGC target value of  $1 \times 10^5$  with a maximum injection time of  $25$  ms and a normalized collision energy of  $27\%$ .

The SCX fractions were analysed with same Ultimate HPLC and the same nano-column coupled on-line to an Orbitrap Lumos mass spectrometer (ThermoFisher

Scientific). For these runs, we used same gradient and LC setting of bottom up data with specific MS settings for cross-links: survey MS1 Orbitrap scan at 120,000 resolution from 350 to 1,400, AGC target of 250% and maximum inject time of 50 ms. For the MS2 Orbitrap scan we used 30,000 resolution, AGC target of 200%, and maximum inject time of 118 ms for detection of DSSO signature peaks (difference in mass of 37.972 Da). The four ions with this specific difference were analysed with a MS3 Ion Trap scans at AGC target of 200%, maximum inject time of 200 ms for sequencing selected signature peaks (representing the individual peptides).

**Data processing.** Raw raw files obtained with classical bottom-up approach were analysed with MaxQuant version 1.6.17 with all the automatic settings adding Deamidation (N) as dynamic modification against the *Bos taurus* reference proteome (Uniprot version of 02/2021 with 37,512 entries). With this search, we were able to calculate intensity-based absolute quantification values and created a smaller FASTA file to use for analysis of cross-linking experiments. Raw files for cross-linked cells were analysed with Proteome Discoverer software version 2.5 (ThermoFisher Scientific) with the incorporated XlinkX node for analysis of cross-linked peptides as described by <sup>72</sup>. Data were searched against the smaller FASTA created in house with “MS2\_MS3 acquisition strategy”. For the XlinkX search, we selected full tryptic digestion with three maximum missed cleavages, 10 ppm error for MS1, 20ppm for MS2, and 0.5 Da for MS3 in Ion Trap. For modifications, we used static Carbamidomethyl (C) and dynamic Oxidation (M), Deamidation (N), and Met-loss (protein N-term). The crosslinked peptides were accepted with a minimum score of 40, minimum score difference of 4, and maximum false discovery rate set to 5%; further standard settings were used.

### Fluorescence microscopy.

**Immunofluorescence of SPACA9 and SAXO1 in bovine sperm flagella.** Frozen bovine semen straws were thawed in a 37°C water bath. Thawed semen was diluted in DPBS and centrifuged at 500g for 10 min. The sperm pellet was washed twice with DPBS. The washed sperm suspension was diluted to a concentration of  $\sim 5 \times 10^6$  cells/mL. Approximately 150  $\mu$ L of the suspension was pipetted into the wells of an 8-well ibidi  $\mu$ -slide and left undisturbed for 30 min at RT to allow cells to settle. The sperm were then fixed with 4% formaldehyde in DPBS for 15 min at RT, then permeabilized with 0.1% Triton X-100 in DPBS for 15 min at RT. Cells were washed for 10 min in DPBS. Slides were then blocked with 1% BSA in DPBS for 1 h at RT. Sperm were then incubated with either anti-SAXO1 (HPA023899 from Atlas Antibodies, used at 2  $\mu$ g/mL), anti-SPACA9 (HPA022243 from Atlas Antibodies, used at 6  $\mu$ g/mL), or no primary antibody diluted in blocking buffer for 2 h at RT. After three 10-min washes with DPBS, sperm were incubated with 2° antibody (goat anti-rabbit IgG H+L AlexaFluor488 conjugate, 1/500) diluted in blocking buffer for 45 min at

RT. Sperm were then counterstained with DAPI (1/1000 in DPBS) for 10 min at RT and finally washed thrice with DPBS. A few drops of Fluoroshield mounting medium were then applied to the wells and the slides stored at 4°C in the dark until imaging. Fluorescence microscopy was performed on a ThermoScientific CorrSight in spinning disk mode with a 63X 1.4-NA oil-immersion objective. Images were analyzed using Fiji v 2.0.0-rc-69/1.52p.

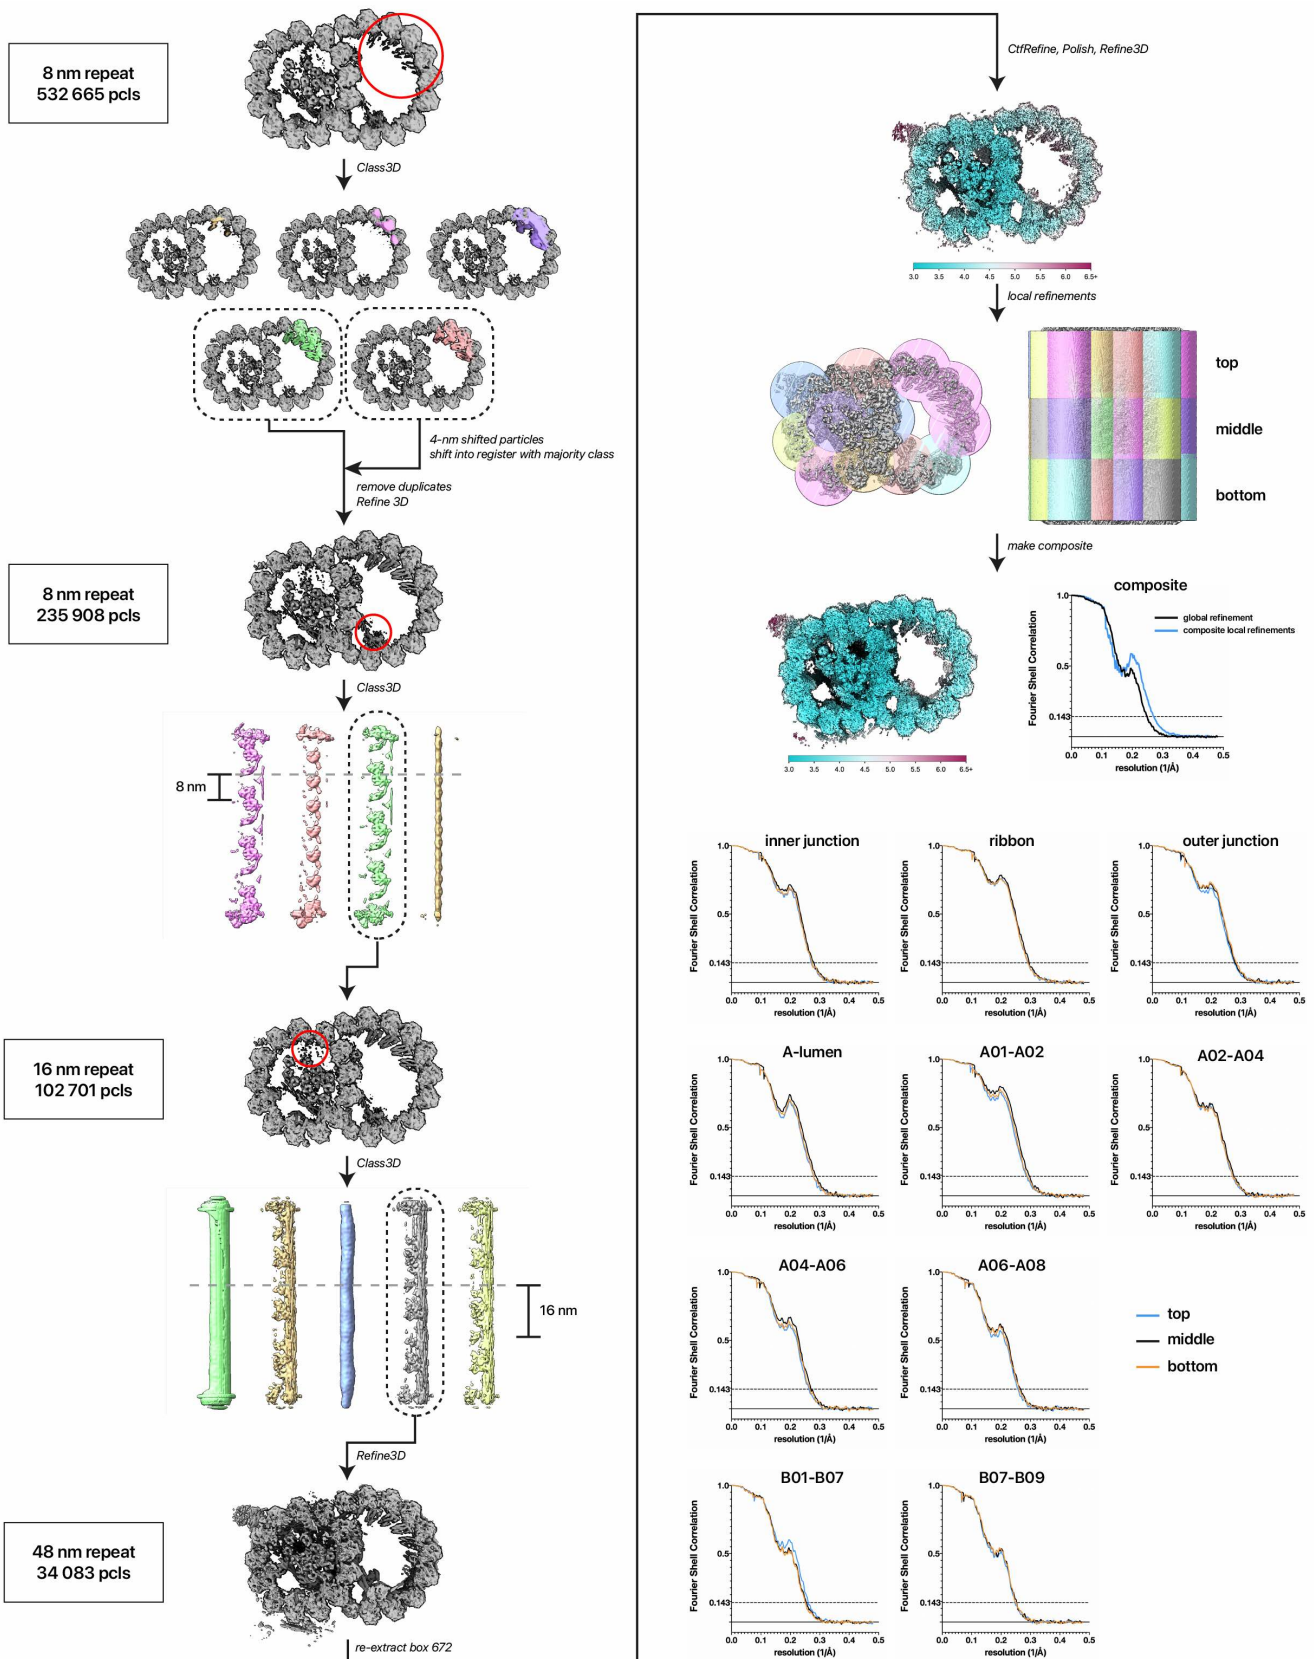

**Fig. S1. Processing workflow used to obtain a cryo-EM map of mammalian sperm DMTs.** Microtubules were picked manually and particles were extracted every 8 nm. After classifying on B-tubule MIPs to enrich for good particles and fully-decorated DMTs, the 16- and 48-nm repeats were recovered by classifying on MIPs at the inner junction and the seam respectively. The 48-nm particles were re-extracted with a box size of 672, CTF-Refined, and polished. To improve resolution for model building, a series of 30 local refinements were performed using the masks shown in the figure. See Methods for more details.

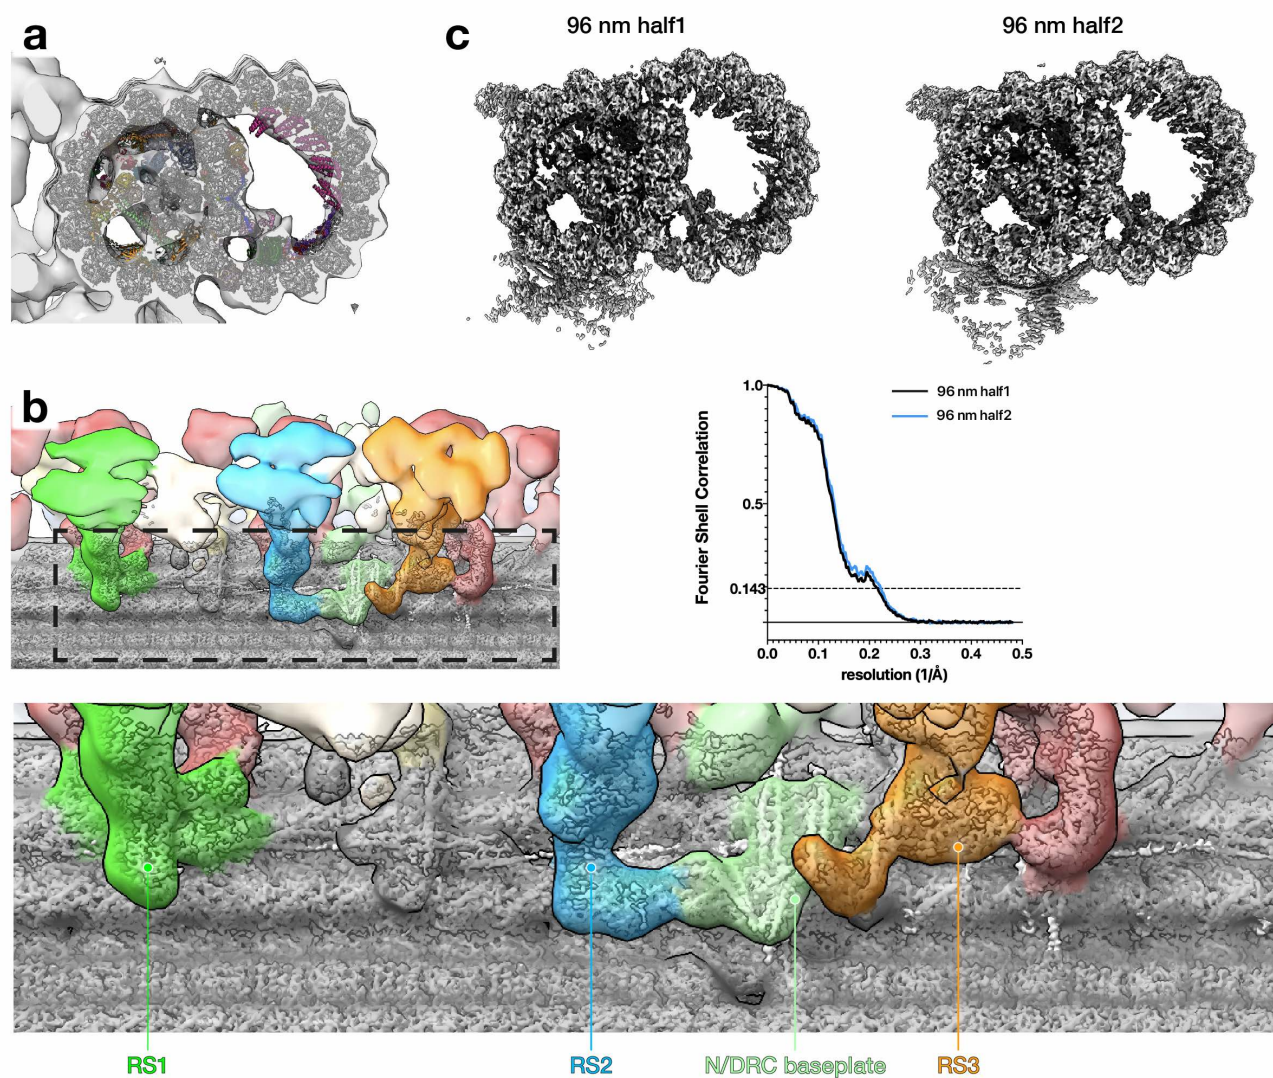

**Fig. S2. Reconstructing the 96-nm DMT repeat from mammalian sperm.** (a) Fitting the atomic model of the 48-nm repeat into in situ subtomogram average of DMTs from pig sperm (EMD-12070) shows that all prominent densities are retained. (b-c) To recover the two halves of the 96-nm repeat, 48-nm particles were classified with a mask covering external complexes bound to protofilaments A02-A04. (b) Fitting the two halves of the 96-nm repeat into the subtomogram average from pig sperm shows that the bases of external axonemal complexes (like the nexin/dynein regulatory complexes and radial spokes) are resolved. (c) Maps of the two halves of the 96-nm repeat with corresponding FSC curves.

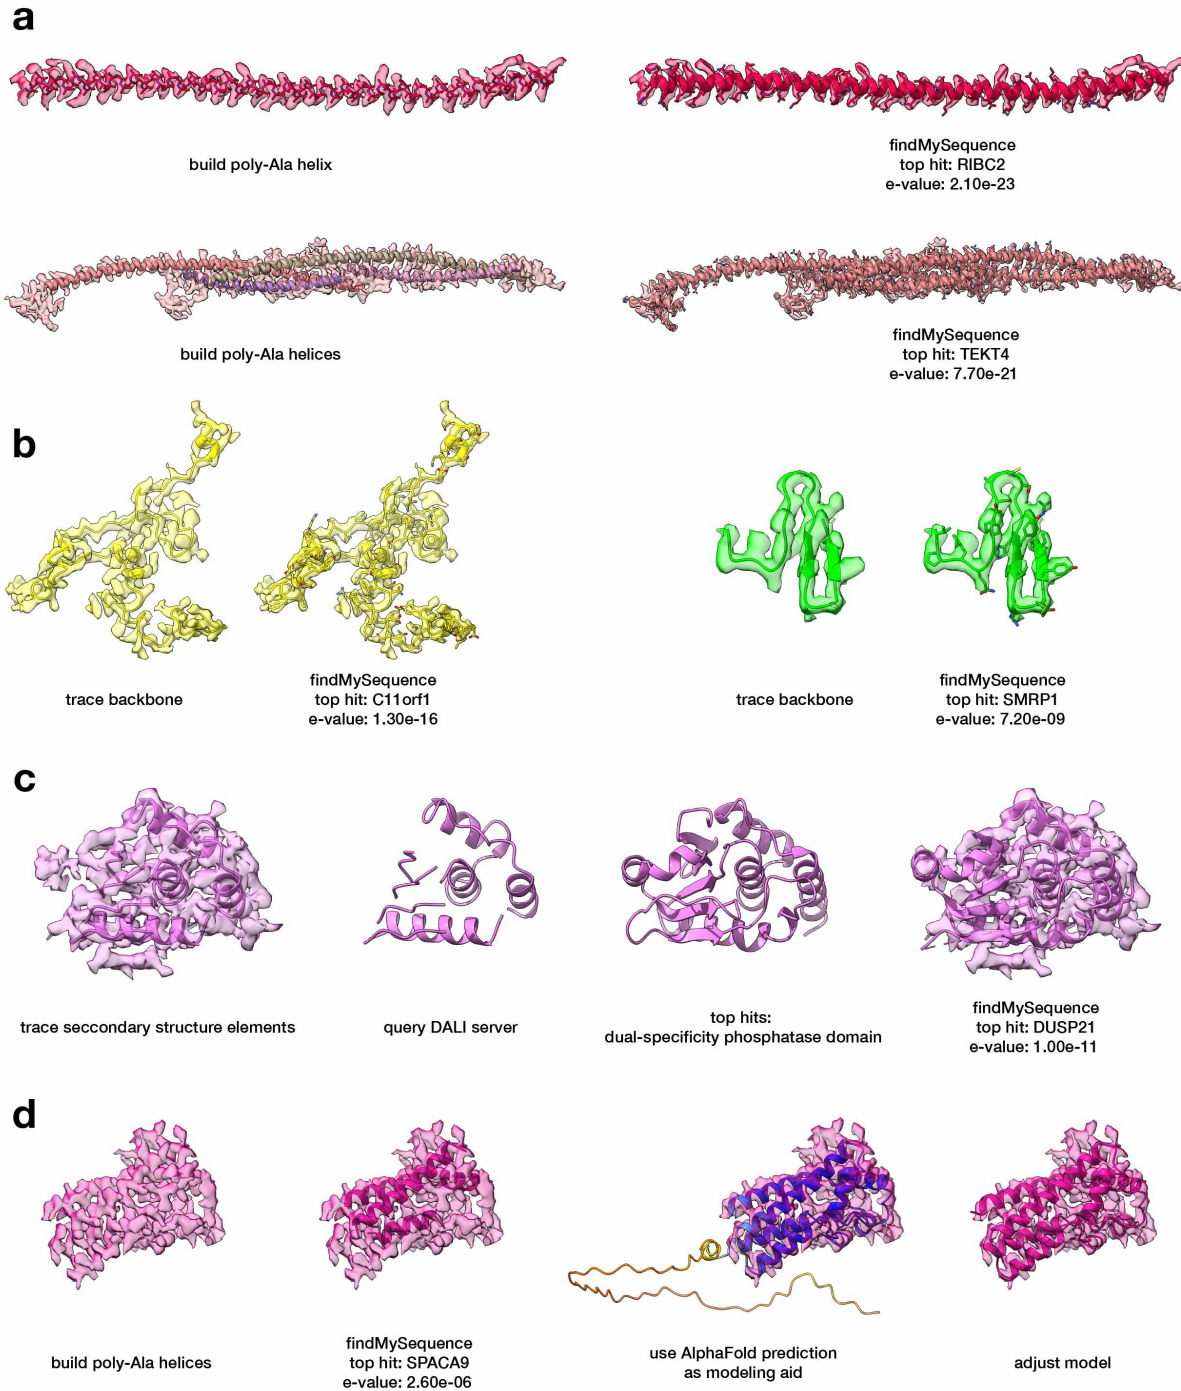

**Fig. S3. Examples of microtubule inner protein identification strategies.** To identify most MIPs, poly-Ala models were manually built into the map, starting with secondary structure elements like helices or sheets as anchors and extending when the density permitted. The findMySequence program<sup>23</sup> was then used to query a database consisting of the 1500 most abundant proteins found by proteomics in our bovine sperm samples. **(a)** The workflow was first internally validated on known MIPs, like RIBC2 and tektins. **(b)** In most cases, backbone traces and findMySequence identified MIPs of varying lengths and folds. **(c)** In the case of DUSP21, running findMySequence directly on traced secondary structure elements did not yield a hit. Querying the DALI server<sup>64</sup> returned dual-specificity phosphatase domains as the top hits. The top hit (PDB 5Y16)<sup>65</sup> was mutated to polyAla, then fitted and refined into the density map of the unknown MIP. Running findMySequence on this model returned DUSP21 as a confident hit. **(d)** In the case of SPACA9, findMySequence could assign protein identity, but it was initially difficult to fully trace the backbone. Fortunately, the AlphaFold2 prediction<sup>66</sup> for SPACA9 was high-quality and could be used to facilitate model building.

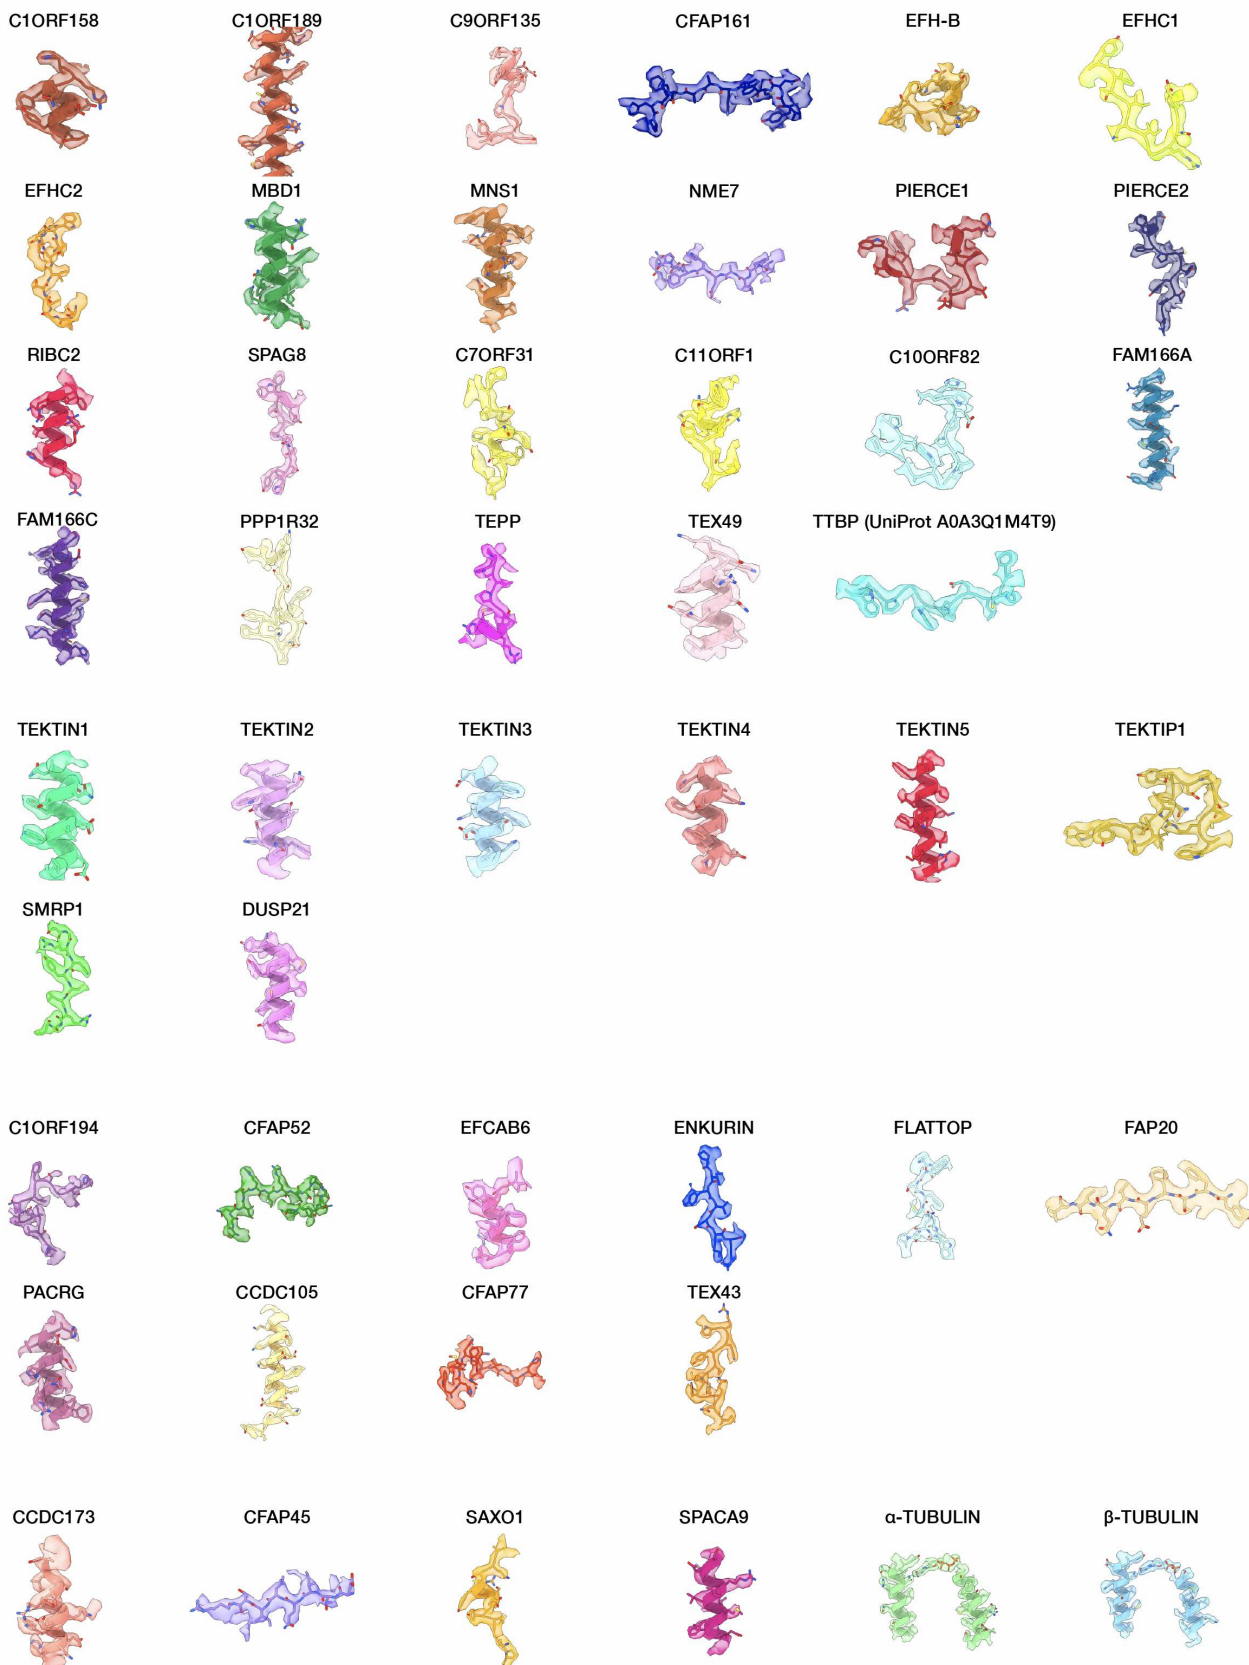

**Fig. S4. Examples of map quality for identified proteins in the bovine sperm DMT.** Proteins are color-coded consistently throughout the manuscript.

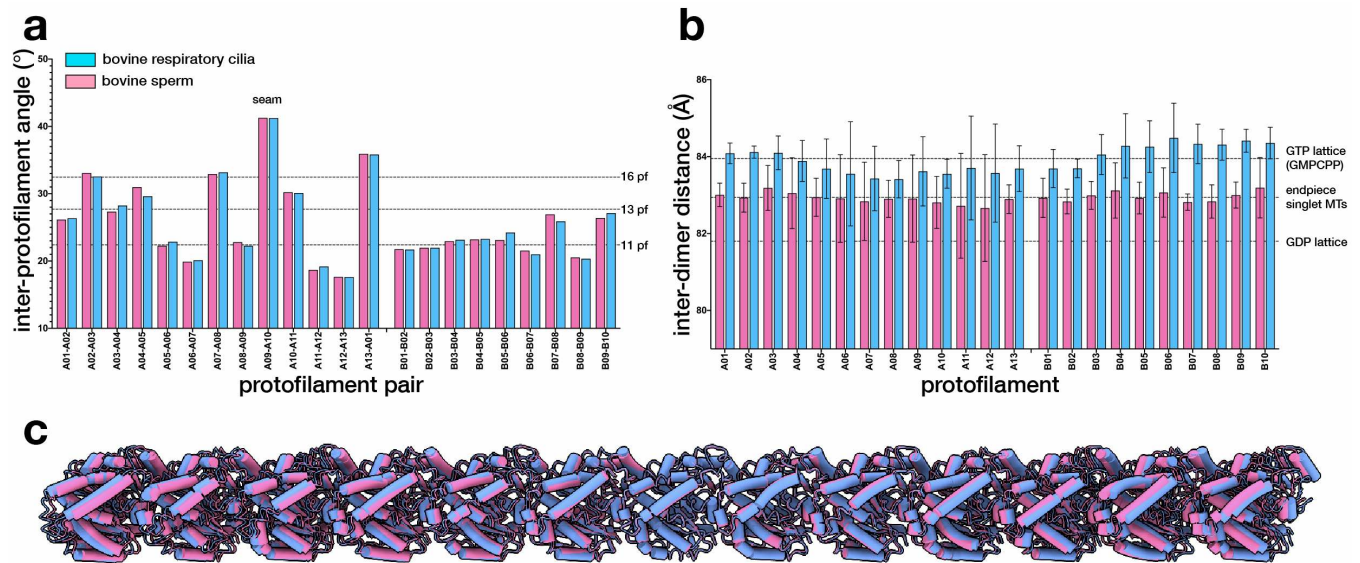

**Fig. S5. Comparing tubulin lattices between bovine tracheal DMTs and bovine sperm DMTs. (a)** The inter-protofilament rotation angles are similar between DMTs from respiratory cilia (blue) and those from sperm (pink). **(b-c)** Bovine sperm DMTs have a more compact tubulin lattice and shorter inter-dimer distances than bovine tracheal DMTs.





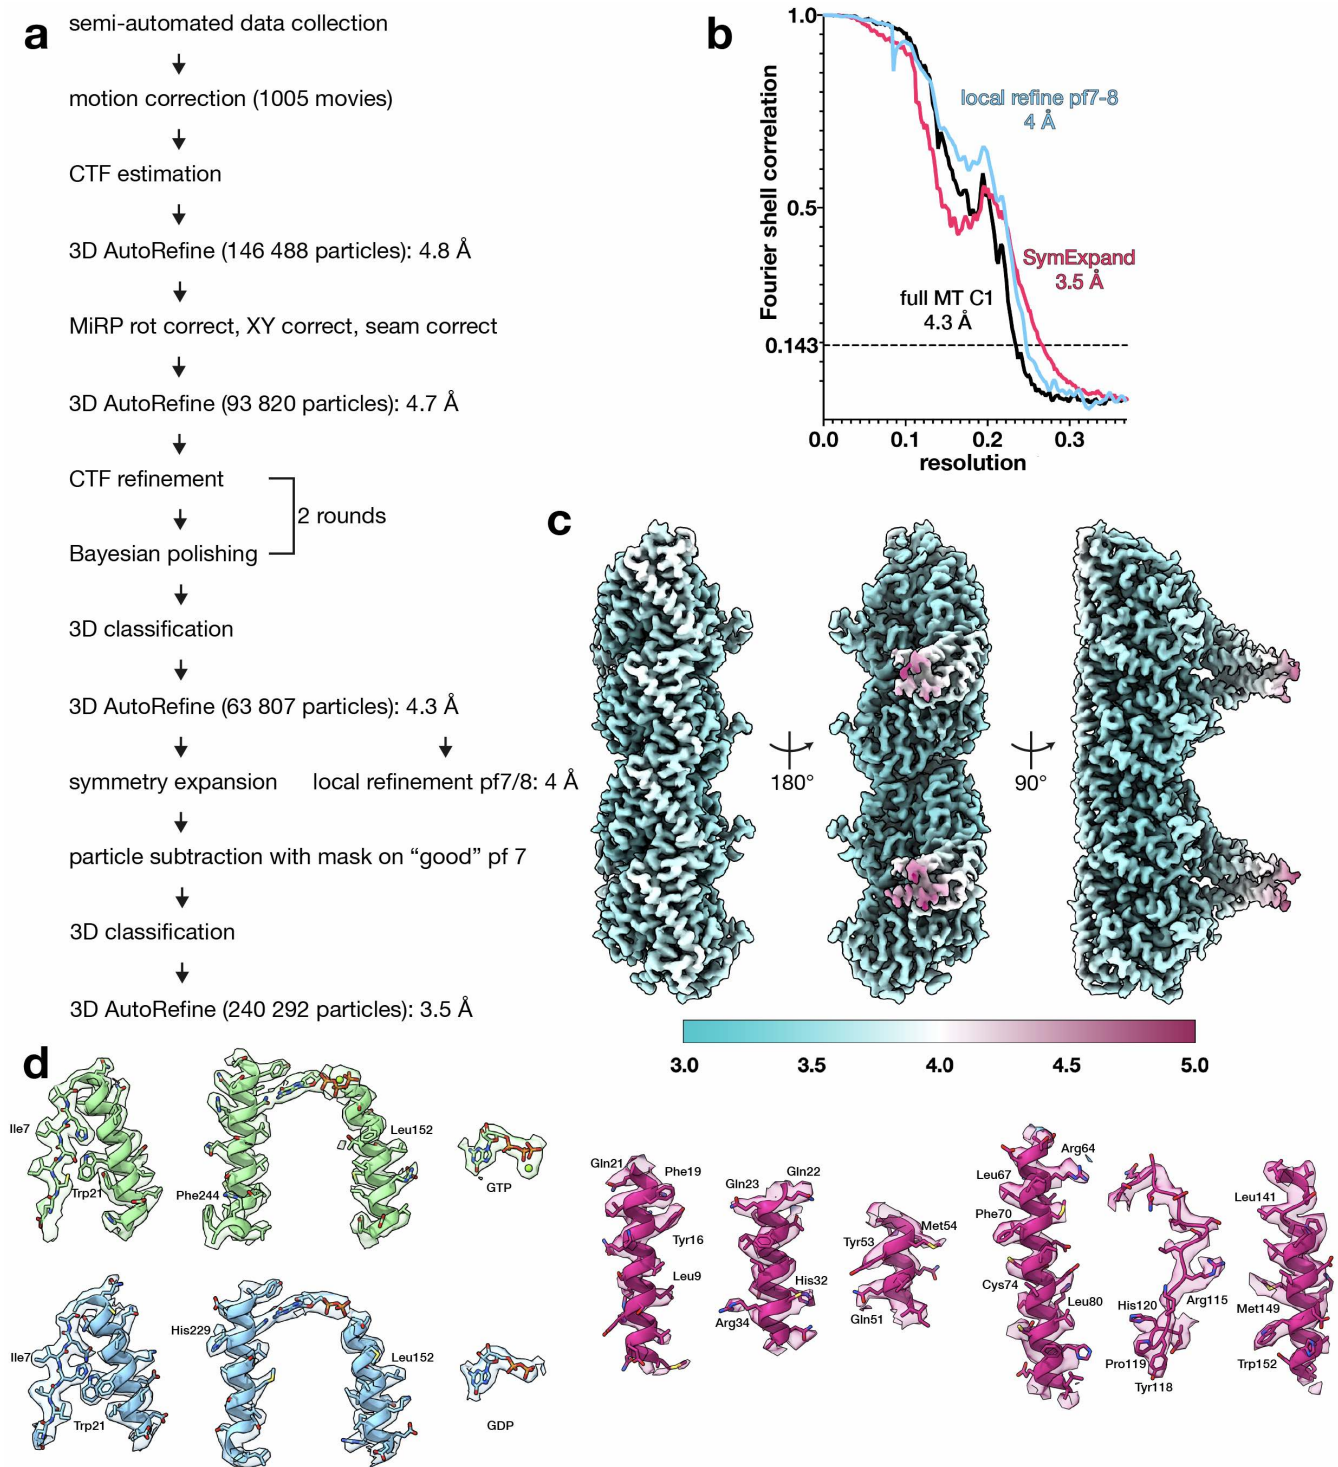

**Fig. S7. Cryo-EM processing workflow and map quality for endpiece singlet microtubules.** (a) The cryo-EM workflow involved standard Relion refinements for a C1 helix, using a 20-Å subtomogram average of pig endpiece microtubules as a reference. After initial alignments, rotation angle correction, X/Y shift correction, and seam checking were performed according to the Microtubule Relion-based Pipeline (MiRP). Particles were then CTF-refined and Bayesian-polished. After 3D classification and selecting only the highest-resolution class, 3D refinement yielded a 4.3-Å C1 reconstruction of the full microtubule. Subsequent local refinement of protofilament 7/8 yielded at 4-Å map. After symmetry expansion and particle subtraction, followed by 3D classification to remove poorly-decorated particles, a refinement run focused on two tubulin dimers resulted in a 3.5-Å reconstruction. (b) Fourier shell correlation (FSC) plots of the full C1 reconstruction (black curve), the local refinement of protofilaments 7/8 (blue curve), and the protofilament reconstruction after symmetry expansion (pink curve). (c) Local resolution of the symmetry-expanded reconstruction, estimated by the “Local Resolution” job in Relion. (d) Examples of map quality in the symmetry-expanded map used for MIP identification and model building.

**Table S1. Cryo-EM data collection, refinement, and validation statistics.**

|                                                     | bovine sperm doublet microtubules,<br>48-nm repeat<br>(EMDB-xxxx)<br>(PDB xxxx) | bovine sperm endpiece<br>singlet microtubules, 8-nm repeat<br>(EMDB-xxxx)<br>(PDB xxxx) |
|-----------------------------------------------------|---------------------------------------------------------------------------------|-----------------------------------------------------------------------------------------|
| <b>Data collection and processing</b>               |                                                                                 |                                                                                         |
| Magnification                                       | 130 000 X                                                                       | 100 000 X                                                                               |
| Voltage (kV)                                        | 200 (dataset 1-4)<br>300 (dataset 5)                                            | 200                                                                                     |
| Electron exposure (e <sup>-</sup> /Å <sup>2</sup> ) | ~48-50                                                                          | ~48-50                                                                                  |
| Defocus range (µm)                                  | -0.5 to -2.5                                                                    | -0.5 to -2.5                                                                            |
| Pixel size (Å)                                      | 1.041 (dataset 1-4)<br>1.06 (dataset 5)                                         | 1.359                                                                                   |
| Symmetry imposed                                    | C1                                                                              | C1, then helical symmetry-expanded                                                      |
| Initial particle images (no.)                       | 532 665 (8-nm)                                                                  | 146 488                                                                                 |
| Final particle images (no.)                         | 34 083 (48-nm)                                                                  | 63 807 (C1), 240 292 (expanded)                                                         |
| Map resolution (Å)                                  | ~3.7                                                                            | ~4.3 (C1), ~3.5 (expanded)                                                              |
| FSC threshold                                       | 0.143                                                                           | 0.143                                                                                   |
| <b>Refinement</b>                                   |                                                                                 |                                                                                         |
| Initial model used (PDB code)                       | 7RRO, 7MIZ, AlphaFold, <i>de novo</i>                                           | 3JAS, 7MIZ, AlphaFold                                                                   |
| Model composition                                   | 1 398 504                                                                       | 8139                                                                                    |
| Non-hydrogen atoms                                  | 175 378                                                                         | 1027                                                                                    |
| Protein residues                                    | GTP: 149, Mg: 149,                                                              | GTP: 1, Mg: 1,                                                                          |
| Ligands                                             | GDP: 153                                                                        | GDP: 1                                                                                  |
| <i>B</i> factors (Å <sup>2</sup> )                  |                                                                                 |                                                                                         |
| Protein                                             | 42.79                                                                           | 61.74                                                                                   |
| Ligand                                              | 45.41                                                                           | 45.86                                                                                   |
| R.m.s. deviations                                   |                                                                                 |                                                                                         |
| Bond lengths (Å)                                    | 0.010                                                                           | 0.002                                                                                   |
| Bond angles (°)                                     | 0.945                                                                           | 0.548                                                                                   |
| Validation                                          |                                                                                 |                                                                                         |
| MolProbity score                                    | 1.80                                                                            | 1.57                                                                                    |
| Clashscore                                          | 9.00                                                                            | 6.18                                                                                    |
| Poor rotamers (%)                                   | 0.59                                                                            | 0.00                                                                                    |
| Ramachandran plot                                   |                                                                                 |                                                                                         |
| Favored (%)                                         | 95.36                                                                           | 96.45                                                                                   |
| Allowed (%)                                         | 4.58                                                                            | 3.45                                                                                    |
| Disallowed (%)                                      | 0.05                                                                            | 0.10                                                                                    |

**Table S2. Top 1500 most abundant proteins identified in bovine sperm.** In the attached Excel file, Tab 1 reports the top 1500 most abundant proteins identified in bovine sperm, ordered according to iBAQ value. Highlighted rows indicate proteins identified as MIPs in the cryo-EM maps. Tab 2 reports the full bovine sperm proteome.

**Table S3. Cross-links identified between tubulin and SAXO1, and between SAXO1 and SPACA9.**

| Max. XlinkX Score | CSMs | Sequence A                | Position A | Sequence B         | Position B | Protein Description A | Protein Description B | Gene name A | Gene name B |
|-------------------|------|---------------------------|------------|--------------------|------------|-----------------------|-----------------------|-------------|-------------|
| 242.81            | 24   | A[K]YPHD[V]VNH[LS]CDE[AR] | 117        | RDFGPH[K]V[L]PV[K] | 83         | A0A3Q1MYU9_BOVIN      | A0A3S5ZPV0_BOVIN      | SPACA9      | SAXO1       |
| 63.69             | 7    | VGINYQPTTVVPGGDLA[K]IVQR  | 370        | G[K]CVCELCSGR      | 7          | F2Z4K0_BOVIN          | A0A3S5ZPV0_BOVIN      | TUBA3E      | SAXO1       |
| 61.96             | 6    | VGINYQPTTVVPGGDLA[K]IVQR  | 370        | MSYVAHPLE[K]R      | 221        | F2Z4K0_BOVIN          | A0A3S5ZPV0_BOVIN      | TUBA3E      | SAXO1       |

960 **Movie S1. Structure of the 48-nm repeat of native axonemal doublet microtubules from mammalian sperm.**

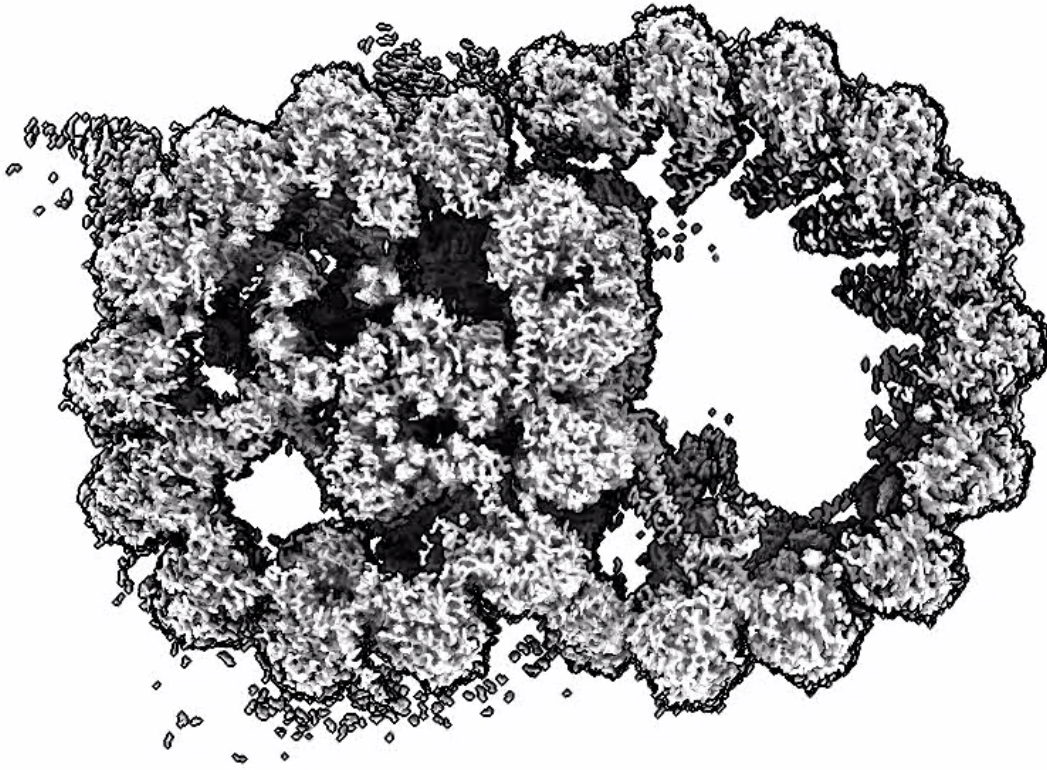

961

962

## References

- 963  
964  
965  
966  
967  
968  
969  
970  
971  
972  
973  
974  
975  
976  
977  
978  
979  
980  
981  
982  
983  
984  
985  
986  
987  
988  
989  
990  
991  
992  
993  
994  
995  
996  
997  
998  
999  
1000  
1001  
1002  
1003  
1004  
1005  
1006  
1007  
1008  
1009  
1010  
1011  
1012  
1013  
1014  
1015  
1016  
1017  
1018  
1019  
1020  
1021  
1022  
1023  
1024  
1025  
1026  
1027  
1028  
1029  
1030  
1031  
1032  
1033  
1034  
1035  
1036  
1037  
1038  
1039  
1040  
1041  
1042  
1043  
1044
1. Suarez, S. S. & Pacey, A. A. Sperm transport in the female reproductive tract. *Hum. Reprod. Update* 12, 23–37 (2006).
2. Wan, K. Y. Coordination of eukaryotic cilia and flagella. *Essays Biochem.* 62, 829–838 (2018).
3. Gilpin, W., Bull, M. S. & Prakash, M. The multiscale physics of cilia and flagella. *Nat. Rev. Phys.* 2, 74–88 (2020).
4. Ishikawa, T. Axoneme structure from motile cilia. *Cold Spring Harb. Perspect. Biol.* 9, a028076 (2017).
5. Ma, M. et al. Structure of the Decorated Ciliary Doublet Microtubule. *Cell* 179, 909–922.e12 (2019).
6. Gui, M. et al. De novo identification of mammalian ciliary motility proteins using cryo-EM. *Cell* 184, 5791–5806.e19 (2021).
7. Ichikawa, M. et al. Tubulin Lattice in Cilia is in a Stressed Form Regulated by Microtubule Inner Proteins. *Proc. Natl. Acad. Sci. U. S. A.* 596478 (2019). doi:10.1101/596478
8. Khalifa, A. et al. The inner junction complex of the cilia is an interaction hub that involves tubulin post-translational modifications. *Elife* 9, 1–25 (2020).
9. Nicastro, D. et al. The molecular architecture of axonemes revealed by cryoelectron tomography. *Science*. 313, 944–948 (2006).
10. Nicastro, D. et al. Cryo-electron tomography reveals conserved features of doublet microtubules in flagella. *Proc. Natl. Acad. Sci.* 108, E845–E853 (2011).
11. Imhof, S. et al. Cryo electron tomography with Volta phase plate reveals novel structural foundations of the 96-nm axonemal repeat in the pathogen *Trypanosoma brucei*. *Elife* 8, 1–30 (2019).
12. Leung, M. R. et al. The multi-scale architecture of mammalian sperm flagella and implications for ciliary motility. *EMBO J.* 40, 1–17 (2021).
13. Lin, J. et al. Cryo-electron tomography reveals ciliary defects underlying human RSPH1 primary ciliary dyskinesia. *Nat. Commun.* 5, 5727 (2014).
14. Greenan, G. A., Vale, R. D. & Agard, D. A. Electron cryotomography of intact motile cilia defines the basal body to axoneme transition. *J. Cell Biol.* 219, 1–14 (2020).
15. Lindemann, C. B. Functional significance of the outer dense fibers of mammalian sperm examined by computer simulations with the geometric clutch model. *Cell Motil. Cytoskeleton* 34, 258–270 (1996).
16. Lindemann, C. B. & Lesich, K. A. Functional anatomy of the mammalian sperm flagellum. *Cytoskeleton* 73, 652–669 (2016).
17. Fawcett, D. W. The mammalian spermatozoon. *Dev. Biol.* 44, 394–436 (1975).
18. Gadêlha, H. & Gaffney, E. A. Flagellar ultrastructure suppresses buckling instabilities and enables mammalian sperm navigation in high-viscosity media. *J. R. Soc. Interface* 16, 20180668 (2019).
19. Zabeo, D. et al. A lumenal interrupted helix in human sperm tail microtubules. *Sci. Rep.* 8, 2727 (2018).
20. Gadadhar, S. et al. Tubulin glycylation controls axonemal dynein activity, flagellar beat, and male fertility. *Science*. 371, eabd4914 (2021).
21. Chen, Z. et al. In situ cryo-electron tomography reveals the asymmetric architecture of mammalian sperm axonemes. 1–42 (2022).
22. Lindemann, C. B., Fentie, I. & Rikmenspoel, R. A selective effect of Ni<sup>2+</sup> on wave initiation in bull sperm flagella. *J. Cell Biol.* 87, 420–426 (1980).
23. Chojnowski, G. et al. FindMySequence: a neural-network-based approach for identification of unknown proteins in X-ray crystallography and cryo-EM. *IUCrJ* 9, 86–97 (2022).
24. Uhlén, M. et al. Tissue-based map of the human proteome. *Science*. 347, (2015).
25. Afzelius, B. A., Dallai, R., Lanzavecchia, S. & Bellon, P. L. Flagellar structure in normal human spermatozoa and in spermatozoa that lack dynein arms. *Tissue Cell* 27, 241–247 (1995).
26. Sigg, M. A. et al. Evolutionary Proteomics Uncovers Ancient Associations of Cilia with Signaling Pathways. *Dev. Cell* 43, 744–762.e11 (2017).
27. Firat-Karalar, E. N., Sante, J., Elliott, S. & Stearns, T. Proteomic analysis of mammalian sperm cells identifies new components of the centrosome. *J. Cell Sci.* 127, 4128–4133 (2014).
28. Tabach, Y. et al. Human disease locus discovery and mapping to molecular pathways through phylogenetic profiling. *Mol. Syst. Biol.* 9, 1–17 (2013).
29. Shen, Y. et al. Loss-of-function mutations in QRICH2 cause male infertility with multiple morphological abnormalities of the sperm flagella. *Nat. Commun.* 10, 1–15 (2019).
30. Wang, X. et al. Cryo-EM structure of cortical microtubules from human parasite *Toxoplasma gondii* identifies their microtubule inner proteins. *Nat. Commun.* 12, 3065 (2021).
31. Dacheux, D. et al. A MAP6-Related protein is present in protozoa and is involved in flagellum motility. *PLoS One* 7, (2012).
32. Dacheux, D. et al. Human FAM154A (SAXO1) is a microtubule-stabilizing protein specific to cilia and related structures. *J. Cell Sci.* 128, 1294–1307 (2015).
33. Gadadhar, S. et al. Tubulin glycylation controls axonemal dynein activity, flagellar beat, and male fertility. *Science*. 371, (2021).
34. Zabeo, D., Croft, J. T. & Höög, J. L. Axonemal doublet microtubules can split into two complete singlets in human sperm flagellum tips. *FEBS Lett.* 593, 892–902 (2019).
35. Ferro, L. S. et al. Structural and functional insight into regulation of kinesin-1 by microtubule-associated protein MAP7. *Science*. 375, 326–331 (2022).
36. Owa, M. et al. Inner lumen proteins stabilize doublet microtubules in cilia and flagella. *Nat. Commun.* 10, 1143 (2019).
37. Kirima, J. & Oiwa, K. Flagellar-associated protein FAP85 is a microtubule inner protein that stabilizes microtubules. *Cell Struct. Funct.* 43, 1–14 (2018).
38. Nogales, E., Whittaker, M., Milligan, R. A. & Downing, K. H. High-resolution model of the microtubule. *Cell* 96, 79–88 (1999).
39. VanBuren, V., Odde, D. J. & Cassimeris, L. Estimates of lateral and longitudinal bond energies within the microtubule lattice. *Proc. Natl. Acad. Sci. U. S. A.* 99, 6035–6040 (2002).
40. Soares, H., Carmona, B., Nolasco, S., Viseu Melo, L. & Gonçalves, J. Cilia Distal Domain: Diversity in Evolutionarily Conserved Structures. *Cells* 8, 160 (2019).
41. Neal, C. V., Hall-McNair, A. L., Kirkman-Brown, J., Smith, D. J. & Gallagher, M. T. Doing more with less: The flagellar end piece enhances the propulsive effectiveness of human spermatozoa. *Phys. Rev. Fluids* 5, 073101 (2020).
42. Ferreira, J. L. et al. Form follows function: Variable microtubule architecture in the malaria parasite. *bioRxiv* 2022.04.13.488170 (2022).
43. Cifuentes, M. et al. Expression of a Novel Ciliary Protein, IILG9, During the Differentiation and Maturation of Ependymal Cells. *Mol. Neurobiol.* 55, 1652–1664 (2018).
44. Blackburn, K., Bustamante-Marin, X., Yin, W., Goshe, M. B. & Ostrowski, L. E. Quantitative Proteomic Analysis of Human Airway Cilia Identifies Previously Uncharacterized Proteins of High Abundance. *J. Proteome Res.* 16, 1579–1592 (2017).
45. Yamaguchi, H., Oda, T., Kikkawa, M. & Takeda, H. Systematic studies of all PIH proteins in zebrafish reveal their distinct roles in axonemal dynein assembly. *Elife* 7, 1–25 (2018).
46. Pitnick, S., Hosken, D. J. & Birkhead, T. R. Sperm morphological diversity. in *Sperm Biology* 69–149 (Elsevier Ltd, 2009). doi:10.1016/B978-0-12-372568-4.00003-3
47. Bastin, B. R. & Schneider, S. Q. Taxon-specific expansion and loss of tektins inform metazoan ciliary diversity. *BMC Evol. Biol.* 19, 1–25 (2019).
48. Tanaka, H. et al. Mice Deficient in the Axonemal Protein Tektin-t Exhibit Male Infertility and Immotile-Cilium Syndrome Due to Impaired Inner Arm Dynein Function. *Mol. Cell. Biol.* 24, 7958–7964 (2004).
49. Roy, A., Lin, Y.-N., Agno, J. E., DeMayo, F. J. & Matzuk, M. M. Absence of tektin 4 causes asthenozoospermia and subfertility in male mice. *FASEB J.* 21, 1013–1025 (2007).

- 1130 50. Roy, A., Lin, Y. N., Agno, J. E., Demayo, F. J. & Matzuk, M. M. Tektin 3 is  
1131 required for progressive sperm motility in mice. *Mol. Reprod. Dev.* 76, 453–459  
1132 (2009).  
1133
- 1134 51. Ryan, R. et al. Functional characterization of tektin-1 in motile cilia and evidence  
1135 for TEKT1 as a new candidate gene for motile ciliopathies. *Hum. Mol. Genet.* 27,  
1136 266–282 (2018).  
1137
- 1138 52. Miyata, H. et al. SPATA33 localizes calcineurin to the mitochondria and regu-  
1139 lates sperm motility in mice. *Proc. Natl. Acad. Sci. U. S. A.* 118, 1–9 (2021).  
1140
- 1141 53. Sun, J. et al. CRISPR/Cas9-based genome editing in mice uncovers 13 testis-  
1142 or epididymis-enriched genes individually dispensable for male reproduction. *Biol.*  
1143 *Reprod.* 103, 183–194 (2020).  
1144
- 1145 54. Castaneda, J. M. et al. FAM209 associates with DPY19L2, and is required for  
1146 sperm acrosome biogenesis and fertility in mice. *J. Cell Sci.* 134, (2021).  
1147
- 1148 55. Robertson, M. J. et al. Large-scale discovery of male reproductive tract-specific  
1149 genes through analysis of RNA-seq datasets. *BMC Biol.* 18, 1–28 (2020).  
1150
- 1151 56. Miyata, H. et al. Genome engineering uncovers 54 evolutionarily conserved  
1152 and testis-enriched genes that are not required for male fertility in mice. *Proc. Natl.*  
1153 *Acad. Sci.* 113, 7704–7710 (2016).  
1154
- 1155 57. De Jonge, C. & Barratt, C. L. R. The present crisis in male reproductive health:  
1156 an urgent need for a political, social, and research roadmap. *Andrology* 7, 762–768  
1157 (2019).  
1158
- 1159 58. Ravitsky, V. & Kimmins, S. The forgotten men: rising rates of male infertility  
1160 urgently require new approaches for its prevention, diagnosis and treatment. *Biol.*  
1161 *Reprod.* 101, 872–874 (2019).  
1162
- 1163 59. Hamada, A., Esteves, S. C. & Agarwal, A. Unexplained male infertility. *Hum.*  
1164 *Androl.* 1, 2–16 (2011).  
1165
- 1166 60. Mastronarde, D. N. Automated electron microscope tomography using robust  
1167 prediction of specimen movements. *J. Struct. Biol.* 152, 36–51 (2005).  
1168
- 1169 61. Tegunov, D. & Cramer, P. Real-time cryo-electron microscopy data preprocess-  
1170 ing with Warp. *Nat. Methods* 16, 1146–1152 (2019).  
1171
- 1172 62. Zivanov, J. et al. New tools for automated high-resolution cryo-EM structure  
1173 determination in RELION-3. *Elife* 7, 1–22 (2018).  
1174
- 1175 63. Goddard, T. D. et al. UCSF ChimeraX: Meeting modern challenges in visualiza-  
1176 tion and analysis. *Protein Sci.* 27, 14–25 (2018).  
1177
- 1178 64. Holm, L. & Rosenström, P. Dali server: Conservation mapping in 3D. *Nucleic*  
1179 *Acids Res.* 38, 545–549 (2010).  
1180
- 1181 65. Ku, B. et al. Structural and biochemical analysis of atypically low dephospho-  
1182 rylating activity of human dual-specificity phosphatase 28. *PLoS One* 12, 1–18  
1183 (2017).  
1184
- 1185 66. Jumper, J. et al. Highly accurate protein structure prediction with AlphaFold.  
1186 *Nature* 596, 583–589 (2021).  
1187
- 1188 67. Cook, A. D., Manka, S. W., Wang, S., Moores, C. A. & Atherton, J. A microtubule  
1189 RELION-based pipeline for cryo-EM image processing. *J. Struct. Biol.* 209, 107402  
1190 (2020).  
1191
- 1192 68. Cook, A. D. et al. Cryo-EM structure of a microtubule-bound parasite kinesin  
1193 motor and implications for its mechanism and inhibition. *J. Biol. Chem.* 297, 101063  
1194 (2021).  
1195
- 1196 69. Zhang, R., Alushin, G. M., Brown, A. & Nogales, E. Mechanistic origin of mi-  
1197 crotubule dynamic instability and its modulation by EB proteins. *Cell* 162, 849–859  
1198 (2015).  
1199
- 1200 70. Leung, M. R. et al. In-cell structures of conserved supramolecular protein ar-  
1201 rays at the mitochondria–cytoskeleton interface in mammalian sperm. *Proc. Natl.*  
1202 *Acad. Sci.* 118, 1–10 (2021).  
1203
- 1204 71. Krstic, J. et al. Fasting improves therapeutic response in hepatocellular carci-  
1205 noma through p53-dependent metabolic synergism. *Sci. Adv.* 8, (2022).  
1206
- 1207 72. Klykov, O. et al. Efficient and robust proteome-wide approaches for cross-linking  
1208 mass spectrometry. *Nat. Protoc.* 13, 2964–2990 (2018).  
1209
